# Supplementary material for: Implementation of an enhanced recovery after surgery protocol for colorectal cancer in a regional hospital network supported by audit and feedback: a stepped wedge, cluster randomised trial
Source: PubMed Central journal article supplement — BMJ Qual Saf. 2024 Feb 29;33(6):363–74. doi: 10.1136/bmjqs-2023-016594 (PMC11103294; doi:10.1136/bmjqs-2023-016594), 2024-02-29
Supplement: bmjqs-2023-016594supp001.pdf [file bmjqs-2023-016594supp001.pdf]

**Consort check list**

|                                     |                     | Reporting Item                                                                                                                                                 | Page Number                  |
|-------------------------------------|---------------------|----------------------------------------------------------------------------------------------------------------------------------------------------------------|------------------------------|
| <b>Title and Abstract</b>           |                     |                                                                                                                                                                |                              |
| Title                               | <a href="#">#1a</a> | Identification as a randomized trial in the title.                                                                                                             | 1                            |
| Abstract                            | <a href="#">#1b</a> | Structured summary of trial design, methods, results, and conclusions                                                                                          | 1                            |
| <b>Introduction</b>                 |                     |                                                                                                                                                                |                              |
| Background and objectives           | <a href="#">#2a</a> | Scientific background and explanation of rationale                                                                                                             | 2                            |
| Background and objectives           | <a href="#">#2b</a> | Specific objectives or hypothesis                                                                                                                              | 2                            |
| <b>Methods</b>                      |                     |                                                                                                                                                                |                              |
| Trial design                        | <a href="#">#3a</a> | Description of trial design (such as parallel, factorial) including allocation ratio.                                                                          | 2                            |
| Trial design                        | <a href="#">#3b</a> | Important changes to methods after trial commencement (such as eligibility criteria), with reasons                                                             | 3                            |
| Participants                        | <a href="#">#4a</a> | Eligibility criteria for participants                                                                                                                          | 3                            |
| Participants                        | <a href="#">#4b</a> | Settings and locations where the data were collected                                                                                                           | 3                            |
| Interventions                       | <a href="#">#5</a>  | The experimental and control interventions for each group with sufficient details to allow replication, including how and when they were actually administered | Refer to TIDieR checklist    |
| Outcomes                            | <a href="#">#6a</a> | Completely defined prespecified primary and secondary outcome measures, including how and when they were assessed                                              | 4                            |
| Sample size                         | <a href="#">#7a</a> | How sample size was determined.                                                                                                                                | 4 and supplementary material |
| Sample size                         | <a href="#">#7b</a> | When applicable, explanation of any interim analyses and stopping guidelines                                                                                   | na                           |
| Randomization - Sequence generation | <a href="#">#8a</a> | Method used to generate the random allocation sequence.                                                                                                        | 4                            |
| Randomization - Sequence generation | <a href="#">#8b</a> | Type of randomization; details of any restriction (such as blocking and block size)                                                                            | 4                            |
| Randomization - Allocation          | <a href="#">#9</a>  | Mechanism used to implement the random allocation sequence (such as sequentially numbered containers),                                                         | 4                            |

|                                                 |                      |                                                                                                                                                   |                 |
|-------------------------------------------------|----------------------|---------------------------------------------------------------------------------------------------------------------------------------------------|-----------------|
| concealment mechanism                           |                      | describing any steps taken to conceal the sequence until interventions were assigned                                                              |                 |
| Randomization - Implementation                  | <a href="#">#10</a>  | Who generated the allocation sequence, who enrolled participants, and who assigned participants to interventions                                  | 4               |
| Blinding                                        | <a href="#">#11a</a> | If done, who was blinded after assignment to interventions (for example, participants, care providers, those assessing outcomes) and how.         | 4               |
| Blinding                                        | <a href="#">#11b</a> | If relevant, description of the similarity of interventions                                                                                       | 4               |
| Statistical methods                             | <a href="#">#12a</a> | Statistical methods used to compare groups for primary and secondary outcomes                                                                     | 4               |
| Statistical methods                             | <a href="#">#12b</a> | Methods for additional analyses, such as subgroup analyses and adjusted analyses                                                                  | 5               |
| Outcomes                                        | <a href="#">#6b</a>  | Any changes to trial outcomes after the trial commenced, with reasons                                                                             | 5               |
| <b>Results</b>                                  |                      |                                                                                                                                                   |                 |
| Participant flow diagram (strongly recommended) | <a href="#">#13a</a> | For each group, the numbers of participants who were randomly assigned, received intended treatment, and were analysed for the primary outcome    | Figure 1        |
| Participant flow                                | <a href="#">#13b</a> | For each group, losses and exclusions after randomization, together with reason                                                                   | Figure 1        |
| Recruitment                                     | <a href="#">#14a</a> | Dates defining the periods of recruitment and follow-up                                                                                           | 3 and figure S1 |
| Recruitment                                     | <a href="#">#14b</a> | Why the trial ended or was stopped                                                                                                                | na              |
| Baseline data                                   | <a href="#">#15</a>  | A table showing baseline demographic and clinical characteristics for each group                                                                  | Table 1         |
| Numbers analysed                                | <a href="#">#16</a>  | For each group, number of participants (denominator) included in each analysis and whether the analysis was by original assigned groups           | 6 and figure 1  |
| Outcomes and estimation                         | <a href="#">#17a</a> | For each primary and secondary outcome, results for each group, and the estimated effect size and its precision (such as 95% confidence interval) | 7,8             |
| Outcomes and estimation                         | <a href="#">#17b</a> | For binary outcomes, presentation of both absolute and relative effect sizes is recommended                                                       | Table 2         |
| Ancillary analyses                              | <a href="#">#18</a>  | Results of any other analyses performed, including subgroup analyses and adjusted analyses, distinguishing pre-specified from exploratory         | 8 and Figure 3  |
| Harms                                           | <a href="#">#19</a>  | All important harms or unintended effects in each group (For specific guidance see CONSORT for harms)                                             | na              |

|                          |                     |                                                                                                                  |                                                                                                                  |
|--------------------------|---------------------|------------------------------------------------------------------------------------------------------------------|------------------------------------------------------------------------------------------------------------------|
| <b>Discussion</b>        |                     |                                                                                                                  |                                                                                                                  |
| Limitations              | <a href="#">#20</a> | Trial limitations, addressing sources of potential bias, imprecision, and, if relevant, multiplicity of analyses | 7                                                                                                                |
| Interpretation           | <a href="#">#22</a> | Interpretation consistent with results, balancing benefits and harms, and considering other relevant evidence    | 7                                                                                                                |
| Registration             | <a href="#">#23</a> | Registration number and name of trial registry                                                                   | 2                                                                                                                |
| Generalisability         | <a href="#">#21</a> | Generalisability (external validity, applicability) of the trial findings                                        | 8                                                                                                                |
| <b>Other information</b> |                     |                                                                                                                  |                                                                                                                  |
| Interpretation           | <a href="#">#22</a> | Interpretation consistent with results, balancing benefits and harms, and considering other relevant evidence    | 8                                                                                                                |
| Registration             | <a href="#">#23</a> | Registration number and name of trial registry                                                                   | 2                                                                                                                |
| Protocol                 | <a href="#">#24</a> | Where the full trial protocol can be accessed, if available                                                      | Here:<br><a href="https://bmjopen.bmj.com/content/11/6/e047491">https://bmjopen.bmj.com/content/11/6/e047491</a> |
| Funding                  | <a href="#">#25</a> | Sources of funding and other support (such as supply of drugs), role of funders                                  | 10                                                                                                               |
