# Supplementary material for: Implementation of an enhanced recovery after surgery protocol for colorectal cancer in a regional hospital network supported by audit and feedback: a stepped wedge, cluster randomised trial
Source: PubMed Central journal article supplement — BMJ Qual Saf. 2024 Feb 29;33(6):363–74. doi: 10.1136/bmjqs-2023-016594 (PMC11103294; doi:10.1136/bmjqs-2023-016594), 2024-02-29
Supplement: bmjqs-2023-016594supp004.pdf [file bmjqs-2023-016594supp004.pdf]

|                     |                                                                                                                                                                                                                                                                                             |
|---------------------|---------------------------------------------------------------------------------------------------------------------------------------------------------------------------------------------------------------------------------------------------------------------------------------------|
| <b>Titolo</b>       | <b>Studio controllato randomizzato a cluster - stepped wedge - sull' implementazione del protocollo ERAS (Enhanced Recovery After Surgery) nella gestione perioperatoria di pazienti con neoplasia del colon-retto sottoposti a resezione in Piemonte. Uno studio del progetto EASY-NET</b> |
| <b>Titolo breve</b> | <b>ERAS in chirurgia colo-rettale</b>                                                                                                                                                                                                                                                       |
| <b>Versione</b>     | 2.0 - Gennaio 2020                                                                                                                                                                                                                                                                          |
| <b>Promotore</b>    | ASO Santa Croce e Carle di Cuneo<br>SC Chirurgia Generale e Oncologica                                                                                                                                                                                                                      |
| <b>Funding</b>      | Lo studio è incluso tra le attività del Programma di Rete della Ricerca Sanitaria Finalizzata del Ministero della Salute Anno 2016 (NET-2016-02364191) finanziato dal Ministero della Salute e dalla Regione Piemonte (EASY-NET).                                                           |

|                                                        |                                                                                                                                                                                                                                                                                                                                                                                                                                                                                                                                                                                                                                                                                                                                                                                                                                                                                                                                                                                                                                                            |
|--------------------------------------------------------|------------------------------------------------------------------------------------------------------------------------------------------------------------------------------------------------------------------------------------------------------------------------------------------------------------------------------------------------------------------------------------------------------------------------------------------------------------------------------------------------------------------------------------------------------------------------------------------------------------------------------------------------------------------------------------------------------------------------------------------------------------------------------------------------------------------------------------------------------------------------------------------------------------------------------------------------------------------------------------------------------------------------------------------------------------|
| <b>Principal investigators</b>                         | Felice Borghi, MD<br>Ospedale S. Croce e Carle, Cuneo ( <u>centro coordinatore e promotore dello studio</u> )<br>Direttore Dipartimento chirurgico e SC Chirurgia Generale e Oncologica                                                                                                                                                                                                                                                                                                                                                                                                                                                                                                                                                                                                                                                                                                                                                                                                                                                                    |
| <b>Responsabile raccolta dati e analisi statistica</b> | Giovannino Ciccone, MD PhD<br>Unità di Epidemiologia Clinica e Valutativa, “Città della Salute e della Scienza” di Torino e CPO Piemonte, Torino<br>PI del WP3 del programma di rete della RSF2016 (EASY-NET)                                                                                                                                                                                                                                                                                                                                                                                                                                                                                                                                                                                                                                                                                                                                                                                                                                              |
| <b>Co-investigators</b>                                | Luca Pellegrino, MD<br>Ospedale S. Croce e Carle, Cuneo<br>SC Chirurgia Generale e Oncologica<br><br>Donati Danilo, MD<br>Ospedale S. Croce e Carle, Cuneo<br>SC Chirurgia Generale e Oncologica                                                                                                                                                                                                                                                                                                                                                                                                                                                                                                                                                                                                                                                                                                                                                                                                                                                           |
| <b>Comitato scientifico</b>                            | Maurizio Meineri, MD<br>Ospedale S. Croce e Carle, Cuneo<br>SC Anestesia - Blocco Operatorio<br><br>Eva Pagano, MSc<br>Unità di Epidemiologia Clinica e Valutativa, “Città della Salute e della Scienza” di Torino e CPO Piemonte, Torino<br>coPI del WP3 del programma di rete della RSF2016 (EASY-NET)<br><br>Anna Maria Orlando, MA<br>Direzione Sanità<br>Settore Assistenza Specialistica ed Ospedaliera<br>Regione Piemonte<br><br>Sandro Sandrucci, MD, PhD<br>Responsabile della SSD Chirurgia dei Sarcomi e Tumori Rari Viscerali<br>AOU Città della Salute e della Scienza di Torino<br><br>Pietro Caironi, MD<br>Ospedale S. Luigi Gonzaga, Orbassano<br>Direttore SC a Direzione Universitaria Anestesia e Rianimazione<br><br>Paolo Massucco; MD<br>AO Ordine Mauriziano di Torino<br>S.C. Chirurgia ed Oncologia<br><br>Monica Rolfo<br>Responsabile Infermieristico Struttura Humanitas Cellini e Clinica Fornaca Sessant, Torino<br>Referente Infermieristico Nazionale POIS (Peri Operative Italian Society) per il quadriennio 2016/2019 |

|  |                                                                                                                                                                                              |
|--|----------------------------------------------------------------------------------------------------------------------------------------------------------------------------------------------|
|  | Oscar Bertetto; MD, PhD<br>Direttore del Dipartimento Interaziendale Interregionale Rete Oncologica del Piemonte e della Valle d'Aosta,<br>AOU Città della Salute e della Scienza di Torino. |
|--|----------------------------------------------------------------------------------------------------------------------------------------------------------------------------------------------|

|                 |                                                                                                                                      |        |
|-----------------|--------------------------------------------------------------------------------------------------------------------------------------|--------|
| <b>Indice</b>   | Background                                                                                                                           | Pag. 5 |
|                 | Ipotesi                                                                                                                              | 6      |
|                 | Obiettivo principale                                                                                                                 | 8      |
|                 | Obiettivi secondari                                                                                                                  | 8      |
|                 | Disegno dello studio                                                                                                                 | 8      |
|                 | Criteri di inclusione                                                                                                                | 8      |
|                 | Criteri di esclusione                                                                                                                | 9      |
|                 | Metodi di stratificazione e randomizzazione dei centri                                                                               | 9      |
|                 | Gestione peri-operatoria standard                                                                                                    | 9      |
|                 | Gestione sperimentale (ERAS)                                                                                                         | 9      |
|                 | Endpoint                                                                                                                             | 10     |
|                 | Metodi e strumenti di raccolta dei dati e di feedback                                                                                | 10     |
|                 | Considerazioni statistiche su numerosità e potenza dello studio                                                                      | 11     |
|                 | Analisi Statistiche                                                                                                                  | 12     |
|                 | Bibliografia                                                                                                                         | 13     |
| <b>Allegati</b> | 1) Protocollo ERAS per la gestione perioperatoria dei pazienti sottoposti a resezione colo-rettale per neoplasia                     | 15     |
|                 | 2) Scheda raccolta dati (Case Report Form – CRF).                                                                                    | 20     |
|                 | 3) Questionario QoR-15 per valutare la qualità del recupero post-operatorio.                                                         | 21     |
|                 | 4) Questionario SSQ-8 per valutare la soddisfazione dei pazienti dopo la dimissione                                                  | 22     |
|                 | 5) Opuscolo informativo per i pazienti                                                                                               | 23     |
|                 | 6) MUST score                                                                                                                        | 24     |
|                 | 7) Documento di consenso dell'ESPEN 2018                                                                                             | 28     |
|                 | 8) Esempio di scheda per il monitoraggio dell'assunzione del supplemento nutrizionale preoperatorio                                  | 29     |
|                 | 9) Esempio di diario del paziente per il monitoraggio della mobilizzazione e della assunzione di bevande ed alimenti post-intervento | 30     |

|                   |                                                                                                                                                                                                                                                                                                                                                                                                                                                                                                                                                                                                                                                                                                                                                                                                                                                                                                                                                                                                                                                                                                                                                                                                                                                                                                                                                                                                                                                                                                                                                                                                                                                                                                                                                                                                                                                                                                                                                                                                                                                                                                                                                                                                                                                                                                                                                                                                                                                                                                                                                                                                                                                                                                                                                                                                                                                                                                                                                                                                                                                                                                                                                                                                                                                                                                                                                                                                                                                                                                                                                                   |
|-------------------|-------------------------------------------------------------------------------------------------------------------------------------------------------------------------------------------------------------------------------------------------------------------------------------------------------------------------------------------------------------------------------------------------------------------------------------------------------------------------------------------------------------------------------------------------------------------------------------------------------------------------------------------------------------------------------------------------------------------------------------------------------------------------------------------------------------------------------------------------------------------------------------------------------------------------------------------------------------------------------------------------------------------------------------------------------------------------------------------------------------------------------------------------------------------------------------------------------------------------------------------------------------------------------------------------------------------------------------------------------------------------------------------------------------------------------------------------------------------------------------------------------------------------------------------------------------------------------------------------------------------------------------------------------------------------------------------------------------------------------------------------------------------------------------------------------------------------------------------------------------------------------------------------------------------------------------------------------------------------------------------------------------------------------------------------------------------------------------------------------------------------------------------------------------------------------------------------------------------------------------------------------------------------------------------------------------------------------------------------------------------------------------------------------------------------------------------------------------------------------------------------------------------------------------------------------------------------------------------------------------------------------------------------------------------------------------------------------------------------------------------------------------------------------------------------------------------------------------------------------------------------------------------------------------------------------------------------------------------------------------------------------------------------------------------------------------------------------------------------------------------------------------------------------------------------------------------------------------------------------------------------------------------------------------------------------------------------------------------------------------------------------------------------------------------------------------------------------------------------------------------------------------------------------------------------------------------|
| <b>Background</b> | <p>Il protocollo ERAS (Enhanced Recovery After Surgery, recupero accelerato dopo chirurgia) è un percorso multimodale volto ad attenuare lo stress chirurgico, cercando di mantenere l'omeostasi corporea al fine di consentire una rapida ripresa post operatoria del paziente sottoposto a chirurgia maggiore (1-2).</p> <p>I principali obiettivi di ERAS sono:</p> <ul style="list-style-type: none"><li>• ottimizzare la gestione perioperatoria utilizzando procedure basate sull'evidenza scientifica</li><li>• favorire un migliore recupero dell'autonomia del paziente nel post operatorio</li><li>• favorire una diminuzione dei tempi di ricovero</li><li>• aumentare il livello di soddisfazione dei pazienti in merito alle cure ricevute</li><li>• ridurre l'incidenza di complicanze, riammissioni ospedaliere e costi (3-5).</li></ul> <p>Questo percorso, nato in chirurgia colo-rettale intorno alla seconda metà degli anni Novanta, ha dimostrato i suoi vantaggi sia in termini di riduzione delle degenze post operatorie ma soprattutto in termini di riduzione delle complicanze, rispetto ad una gestione perioperatoria tradizionale (6-7). L'ERAS Society ha promosso lo sviluppo di tale percorso grazie alla stesura di linee guida per la chirurgia colo-rettale ed ha inoltre consentito la sua diffusione anche al di fuori di tale ambito chirurgico, creando protocolli adattati alle diverse discipline chirurgiche (8-11) tra queste la chirurgia ginecologica.</p> <p>La strategia ERAS prevede un'ottimizzazione dello stato preoperatorio del paziente sia dal punto di vista fisico, psichico che nutrizionale, incentivando la sospensione del fumo e l'attività fisica. Viene inoltre limitato il digiuno preoperatorio e vengono somministrate maltodestrine circa 3 ore prima della chirurgia. La preparazione intestinale con lassativi viene limitata a casi selezionati, quali la chirurgia del retto medio-inferiore in cui è previsto il confezionamento di una stomia di protezione. Il protocollo prevede inoltre la profilassi del tromboembolismo, la profilassi antibiotica, la prevenzione dell'ipotermia intraoperatoria, l'euvolemia perioperatoria, il privilegiare tecniche chirurgiche mininvasive, la prevenzione della nausea e del vomito postoperatorio, un uso molto limitato del sondino nasogastrico e dei drenaggi chirurgici, la rimozione precoce del catetere urinario e delle infusioni endovenose, un'analgesia multimodale per ridurre al minimo il consumo di oppiacei, la mobilitazione e la rialimentazione precoce nel post-operatorio, per favorire una rapida ripresa delle funzioni gastro-intestinali (4,6,7, 20).</p> <p>Una recente metanalisi condotta su studi randomizzati conferma che l'implementazione del protocollo ERAS in chirurgia colo-rettale consente una significativa riduzione delle complicazioni post operatorie, specialmente di quelle non chirurgiche, rispetto ad una gestione perioperatoria tradizionale. La stessa metanalisi conferma che l'implementazione di un percorso ERAS permette un significativo abbattimento delle degenze post operatorie, senza incrementare il tasso di riammissioni ospedaliere (12).</p> <p>Studi condotti in Alberta a seguito della diffusione nazionale del percorso ERAS in chirurgia colo-rettale hanno dimostrato una significativa riduzione anche dei costi sanitari con un ritorno dell'investimento di 3.8 (cioè, ogni dollaro canadese investito ha consentito un introito di 3.8 dollari canadesi)</p> |
|-------------------|-------------------------------------------------------------------------------------------------------------------------------------------------------------------------------------------------------------------------------------------------------------------------------------------------------------------------------------------------------------------------------------------------------------------------------------------------------------------------------------------------------------------------------------------------------------------------------------------------------------------------------------------------------------------------------------------------------------------------------------------------------------------------------------------------------------------------------------------------------------------------------------------------------------------------------------------------------------------------------------------------------------------------------------------------------------------------------------------------------------------------------------------------------------------------------------------------------------------------------------------------------------------------------------------------------------------------------------------------------------------------------------------------------------------------------------------------------------------------------------------------------------------------------------------------------------------------------------------------------------------------------------------------------------------------------------------------------------------------------------------------------------------------------------------------------------------------------------------------------------------------------------------------------------------------------------------------------------------------------------------------------------------------------------------------------------------------------------------------------------------------------------------------------------------------------------------------------------------------------------------------------------------------------------------------------------------------------------------------------------------------------------------------------------------------------------------------------------------------------------------------------------------------------------------------------------------------------------------------------------------------------------------------------------------------------------------------------------------------------------------------------------------------------------------------------------------------------------------------------------------------------------------------------------------------------------------------------------------------------------------------------------------------------------------------------------------------------------------------------------------------------------------------------------------------------------------------------------------------------------------------------------------------------------------------------------------------------------------------------------------------------------------------------------------------------------------------------------------------------------------------------------------------------------------------------------------|

|                |                                                                                                                                                                                                                                                                                                                                                                                                                                                                                                                                                                                                                                                                                                                                                                                                                                                                                                                                                                                                                                                                                                                                                                                                                                                                                                                                                                                                                                                                                                                                                                                                                                                                                                                                                                                                                                                                                                                                                                                                                                                                                                                                                                                                                                                                                                                                                                                                                                                                                                                                                                                                                                                                                                                                                                                                                                                                                                                                                                                                                                                                                                                                                                                                                                                                                                                                                                                                                                                                                                                                                                                                                                                                                                              |
|----------------|--------------------------------------------------------------------------------------------------------------------------------------------------------------------------------------------------------------------------------------------------------------------------------------------------------------------------------------------------------------------------------------------------------------------------------------------------------------------------------------------------------------------------------------------------------------------------------------------------------------------------------------------------------------------------------------------------------------------------------------------------------------------------------------------------------------------------------------------------------------------------------------------------------------------------------------------------------------------------------------------------------------------------------------------------------------------------------------------------------------------------------------------------------------------------------------------------------------------------------------------------------------------------------------------------------------------------------------------------------------------------------------------------------------------------------------------------------------------------------------------------------------------------------------------------------------------------------------------------------------------------------------------------------------------------------------------------------------------------------------------------------------------------------------------------------------------------------------------------------------------------------------------------------------------------------------------------------------------------------------------------------------------------------------------------------------------------------------------------------------------------------------------------------------------------------------------------------------------------------------------------------------------------------------------------------------------------------------------------------------------------------------------------------------------------------------------------------------------------------------------------------------------------------------------------------------------------------------------------------------------------------------------------------------------------------------------------------------------------------------------------------------------------------------------------------------------------------------------------------------------------------------------------------------------------------------------------------------------------------------------------------------------------------------------------------------------------------------------------------------------------------------------------------------------------------------------------------------------------------------------------------------------------------------------------------------------------------------------------------------------------------------------------------------------------------------------------------------------------------------------------------------------------------------------------------------------------------------------------------------------------------------------------------------------------------------------------------------|
|                | <p>(13). Di fronte a tali evidenze il protocollo ERAS in chirurgia colo-rettale dovrebbe essere adottato in ogni centro chirurgico ma la penetranza del percorso rimane tuttora piuttosto bassa. La ragione di questo risiede nella difficoltà derivante dalla introduzione routinaria di tale percorso. Seppure sarebbe auspicabile ottenere un protocollo più snello e facile da introdurre, non esistono evidenze che ci consentano di poter applicare solo alcuni items del percorso, evitandone altri. Indubbiamente, alcuni elementi hanno un valore determinante su altri. Infatti, dall'analisi dei dati raccolti nel registro ERAS internazionale e nel registro italiano della POIS (Peri-Operative Italian Society, ERAS Italian Chapter), si evince un ruolo determinate della laparoscopia nella ripresa post-operatoria del paziente anche all'interno di un percorso ERAS (14-15). Gli stessi registri dimostrano inoltre come la chirurgia resettiva del retto, specialmente se associata al confezionamento di una stomia di protezione, sia un fattore rallentante la ripresa del paziente anche nell'ambito di un corretto percorso ERAS.</p> <p>Per ovviare alle difficoltà nella implementazione di un percorso così complesso si è ritenuto essenziale una politica Regionale di sensibilizzazione e di formazione dei diversi centri chirurgici.</p> <p>Un programma formale per l'implementazione del protocollo ERAS richiede tre elementi (13-15):</p> <ul style="list-style-type: none"> <li>i) un protocollo operativo ERAS aggiornato e condiviso</li> <li>ii) un team che lavora per la formazione degli operatori e per aumentare la compliance al protocollo</li> <li>iii) un sistema di audit (database) per verificare la compliance al protocollo e per monitorare gli outcome clinici.</li> </ul> <p>In Italia la diffusione della strategia ERAS è l'obiettivo POIS (<a href="http://perioperativeitaliansociety.org">http://perioperativeitaliansociety.org</a>) la cui mission è promuovere la mini-invasività del percorso chirurgico e migliorare la qualità di vita del paziente nel periodo perioperatorio.</p> <p>La Società ha attivato un network di oltre 70 ospedali italiani e ha messo a punto un database per la chirurgia colo-rettale che ha permesso la recente pubblicazione di studi multicentrici (15-17).</p> <p>Nell'ambito della chirurgia colo-rettale il protocollo ERAS-POIS stilato sarà il riferimento dello studio in oggetto (allegato n.1).</p> <p>L'ipotesi di sperimentare l'applicazione del protocollo ERAS per alcuni interventi selezionati (in particolare per la chirurgia colo-rettale e per gli interventi di isterectomia) e di valutarne l'impatto in termini di miglioramento di efficienza e di sicurezza è stata considerata una priorità regionale, tale da includerla nel più generale progetto di rete sulla valutazione di efficacia degli interventi di audit and feedback (Progetto di rete - Ricerca Sanitaria Finalizzata 2016). In questo progetto di rete (NET-2016-02364191), che coinvolge a livello nazionale 7 regioni con il coordinamento della Regione Lazio, la Regione Piemonte è responsabile del Work Package 3 (WP3) che prevede l'impiego di un disegno controllato e randomizzato a cluster per stimare l'effetto sull'intero sistema ospedaliero di interventi di miglioramento della qualità dell'assistenza in ambito oncologico, con un approccio di audit and feedback intensivo basato su dati raccolti in database dedicati, gestito centralmente, rispetto ad approcci tradizionali di audit basati su iniziative locali o con indicatori centrali che utilizzano solo dati correnti.</p> |
| <b>Ipotesi</b> | <p>Questo studio è stato progettato sulla base di due ipotesi principali:</p> <ul style="list-style-type: none"> <li>a) il protocollo ERAS ha una elevata probabilità, sulla base delle evidenze</li> </ul>                                                                                                                                                                                                                                                                                                                                                                                                                                                                                                                                                                                                                                                                                                                                                                                                                                                                                                                                                                                                                                                                                                                                                                                                                                                                                                                                                                                                                                                                                                                                                                                                                                                                                                                                                                                                                                                                                                                                                                                                                                                                                                                                                                                                                                                                                                                                                                                                                                                                                                                                                                                                                                                                                                                                                                                                                                                                                                                                                                                                                                                                                                                                                                                                                                                                                                                                                                                                                                                                                                  |

|  |                                                                                                                                                                                                                                                                                                                                                                                                                                                                                                                                                                                                                                                                                                                                                                                                                                                                                                                                                                                                                                                                                                                                                                                                                                                                                                                                                                                                                                                                                                                                                                                                                                                                                                                                                                                                                                                                                                                                                                                                                                                                                                                            |
|--|----------------------------------------------------------------------------------------------------------------------------------------------------------------------------------------------------------------------------------------------------------------------------------------------------------------------------------------------------------------------------------------------------------------------------------------------------------------------------------------------------------------------------------------------------------------------------------------------------------------------------------------------------------------------------------------------------------------------------------------------------------------------------------------------------------------------------------------------------------------------------------------------------------------------------------------------------------------------------------------------------------------------------------------------------------------------------------------------------------------------------------------------------------------------------------------------------------------------------------------------------------------------------------------------------------------------------------------------------------------------------------------------------------------------------------------------------------------------------------------------------------------------------------------------------------------------------------------------------------------------------------------------------------------------------------------------------------------------------------------------------------------------------------------------------------------------------------------------------------------------------------------------------------------------------------------------------------------------------------------------------------------------------------------------------------------------------------------------------------------------------|
|  | <p>disponibili, di introdurre nella pratica clinica procedure con un bilancio favorevole tra benefici e rischi (sia per i pazienti, sia per il personale);</p> <p>b) che la semplice diffusione del protocollo in ospedali selezionati e favorevolmente predisposti al cambiamento avrebbe un impatto limitato sulla qualità complessiva degli interventi su scala regionale, con conseguente accentuazione dell'eterogeneità delle prestazioni tra centri e di riduzione dell'equità tra i pazienti.</p> <p>Tenuto conto delle evidenze disponibili e delle opportunità fornite dal contesto regionale, l'Assessorato alla Sanità della Regione Piemonte ha considerato l'implementazione del protocollo ERAS in tutti gli ospedali regionali, nell'ambito di un progetto di ricerca, un obiettivo ad elevata priorità. Sulla base di queste premesse è stato disegnato un progetto di ricerca/intervento che dovrebbe, in un arco di tempo di circa 2 anni, favorire una corretta conoscenza ed adozione sistematica del protocollo ERAS su scala regionale da parte di tutti i centri che eseguono interventi chirurgici di resezione colo-rettale per neoplasia. Per poter stimare in modo accurato l'impatto reale del protocollo è stato disegnato uno studio randomizzato a cluster (dove i cluster sono rappresentati dai reparti di chirurgia generale degli ospedali regionali) con adozione progressiva del protocollo da parte di gruppi di reparti secondo un calendario determinato in modo random (definito "stepped wedge") che al termine dello studio avrà coinvolto tutti i cluster. Al termine dello studio ogni cluster avrà un periodo di attività con procedure abituali ("periodo di controllo") ed uno successivo all'introduzione del protocollo ("periodo sperimentale") analogamente ai disegni con cross-over, ma con una sola transizione (da controllo a sperimentale).</p> <p>Ipotizziamo che l'adozione del protocollo determini una riduzione della durata della degenza, delle complicanze, dei costi sanitari e migliori il recupero funzionale e la soddisfazione delle pazienti.</p> |
|--|----------------------------------------------------------------------------------------------------------------------------------------------------------------------------------------------------------------------------------------------------------------------------------------------------------------------------------------------------------------------------------------------------------------------------------------------------------------------------------------------------------------------------------------------------------------------------------------------------------------------------------------------------------------------------------------------------------------------------------------------------------------------------------------------------------------------------------------------------------------------------------------------------------------------------------------------------------------------------------------------------------------------------------------------------------------------------------------------------------------------------------------------------------------------------------------------------------------------------------------------------------------------------------------------------------------------------------------------------------------------------------------------------------------------------------------------------------------------------------------------------------------------------------------------------------------------------------------------------------------------------------------------------------------------------------------------------------------------------------------------------------------------------------------------------------------------------------------------------------------------------------------------------------------------------------------------------------------------------------------------------------------------------------------------------------------------------------------------------------------------------|

|                              |                                                                                                                                                                                                                                                                                                                                                                                                                                                                                                                                                                                                                                                                                                                                                                                                                                                                                                                                                                                                                                                                                             |
|------------------------------|---------------------------------------------------------------------------------------------------------------------------------------------------------------------------------------------------------------------------------------------------------------------------------------------------------------------------------------------------------------------------------------------------------------------------------------------------------------------------------------------------------------------------------------------------------------------------------------------------------------------------------------------------------------------------------------------------------------------------------------------------------------------------------------------------------------------------------------------------------------------------------------------------------------------------------------------------------------------------------------------------------------------------------------------------------------------------------------------|
| <b>Obiettivo principale</b>  | Ridurre la durata della degenza totale nel periodo sperimentale rispetto al periodo di controllo attraverso l'implementazione del protocollo perioperatorio standardizzato ERAS per la gestione dei pazienti candidati a intervento resettivo colo-rettale per neoplasia (protocollo ERAS-POIS)                                                                                                                                                                                                                                                                                                                                                                                                                                                                                                                                                                                                                                                                                                                                                                                             |
| <b>Obiettivi secondari</b>   | <p>Verificare che nel passaggio da periodo di controllo a periodo sperimentale si riduca la frequenza di:</p> <ul style="list-style-type: none"> <li>• complicanze post chirurgiche</li> <li>• trasferimenti in terapia intensiva</li> <li>• degenze di durata superiore alla soglia</li> <li>• reinterventi</li> <li>• accessi in PS</li> <li>• riammissioni in ospedale</li> </ul> <p>Valutare la compliance al protocollo ERAS, complessivamente e per i singoli aspetti/procedure.</p> <p>Comparare tra i due periodi:</p> <ul style="list-style-type: none"> <li>• l'utilizzo della tecnica laparoscopica.</li> <li>• la qualità del recupero post-operatorio</li> <li>• la soddisfazione percepita dai pazienti</li> <li>• l'impatto economico</li> </ul> <p>Nel periodo sperimentale analizzare:</p> <ul style="list-style-type: none"> <li>• i fattori organizzativi e strutturali dei reparti associati alla compliance al protocollo ERAS</li> <li>• la relazione tra compliance al protocollo ERAS e outcome dei pazienti</li> <li>• la soddisfazione degli operatori</li> </ul> |
| <b>Disegno dello studio</b>  | Studio multicentrico controllato randomizzato a cluster, con disegno <i>stepped wedge</i> , di confronto tra la gestione perioperatoria standard e quella secondo il protocollo ERAS.                                                                                                                                                                                                                                                                                                                                                                                                                                                                                                                                                                                                                                                                                                                                                                                                                                                                                                       |
| <b>Criteri di inclusione</b> | <p>Tutti i reparti di chirurgia generale degli ospedali regionali che eseguono interventi di chirurgia colo-rettale per neoplasia per via laparoscopica o laparotomica.</p> <p>Tutti i pazienti che durante lo studio vengono ricoverati per intervento chirurgico elettivo di resezione colo-rettale per patologia maligna con o senza confezionamento di stomia di protezione</p>                                                                                                                                                                                                                                                                                                                                                                                                                                                                                                                                                                                                                                                                                                         |



|                                                               |                                                                                                                                                                                                                                                                                                                                                                                                                                                                                                                                                                                                                                                                                                                                                                                                                                                                                                                                                                                                                                                                                                                                                                                                                                                                                                                                                                                                                                                                                                                                                                                                                                                                                                                                                                                                                                                  |
|---------------------------------------------------------------|--------------------------------------------------------------------------------------------------------------------------------------------------------------------------------------------------------------------------------------------------------------------------------------------------------------------------------------------------------------------------------------------------------------------------------------------------------------------------------------------------------------------------------------------------------------------------------------------------------------------------------------------------------------------------------------------------------------------------------------------------------------------------------------------------------------------------------------------------------------------------------------------------------------------------------------------------------------------------------------------------------------------------------------------------------------------------------------------------------------------------------------------------------------------------------------------------------------------------------------------------------------------------------------------------------------------------------------------------------------------------------------------------------------------------------------------------------------------------------------------------------------------------------------------------------------------------------------------------------------------------------------------------------------------------------------------------------------------------------------------------------------------------------------------------------------------------------------------------|
| <b>Criteri di esclusione</b>                                  | <p>Reparti con una casistica inferiore a 30 interventi all'anno di chirurgia resettiva colo-rettale.</p> <p>Pazienti sottoposti a intervento in regime di urgenza.</p> <p>Particolari condizioni di complessità o gravità clinica, da documentare al momento del ricovero, che rappresentino controindicazioni all'applicazione del protocollo ERAS (es. pazienti con ASA score V).</p> <p>I pazienti con disagio socio-assistenziale, da documentare al momento del ricovero, che non permettano un adeguato standard di autonomia personale o di assistenza domiciliare post operatoria (condizioni di demenza grave, disfunzione fisica, stato di indigenza) saranno inclusi e gestiti secondo quanto previsto dallo studio, salvo la decisione della dimissione che dovrà essere valutata in relazione ai problemi specifici (informazioni previste nel database).</p>                                                                                                                                                                                                                                                                                                                                                                                                                                                                                                                                                                                                                                                                                                                                                                                                                                                                                                                                                                       |
| <b>Metodi di stratificazione e randomizzazione dei centri</b> | <p>In base ad una scelta di tipo programmatico regionale sono inclusi nello studio tutti i centri accreditati ad effettuare chirurgia colo-rettale per patologia neoplastica nella Regione Piemonte che soddisfino i criteri di inclusione specifici dello studio.</p> <p>Prima dell'inizio dello studio tutti i reparti saranno contattati dal gruppo di coordinamento per valutare il livello di conoscenza del protocollo ERAS per la chirurgia colo-rettale, la predisposizione ad adottarlo (con registrazione delle principali barriere esistenti) o l'eventuale adozione già avvenuta precedentemente.</p> <p>I centri che risultassero avere già adottato pienamente il protocollo prima dell'inizio dello studio saranno esclusi dalla randomizzazione e inclusi in un gruppo osservazionale.</p> <p>Tutti gli altri centri saranno ordinati in base al volume di interventi colo-rettali programmati nel corso del 2017 e suddivisi in 4 strati (con un numero uguale di reparti per strato). Saranno quindi estratti in modo random gruppi di 4 centri (uno per strato) e i gruppi così formati saranno ordinati secondo una sequenza random di periodo di attivazione del protocollo. In questo modo si garantisce una numerosità degli interventi ed una composizione omogenea dei gruppi per ciascun periodo di attivazione. Tutte le procedure di randomizzazione saranno eseguite dopo aver anonimizzato i centri. La data di attivazione del protocollo e dell'evento formativo sarà infine comunicata a ciascun centro con un preavviso di circa 3 mesi (tempo minimo necessario per consentire la formazione del personale e la predisposizione degli aspetti organizzativi locali). Tutte le procedure di randomizzazione saranno eseguite centralmente dalla SSD Epidemiologia Clinica e Valutativa del CPO – Piemonte.</p> |
| <b>Gestione operatoria standard</b>                           | <p>Prima dell'attivazione del protocollo ciascun centro continuerà a gestire il perioperatorio dei pazienti secondo i protocolli abituali, possibilmente senza introdurre variazioni.</p>                                                                                                                                                                                                                                                                                                                                                                                                                                                                                                                                                                                                                                                                                                                                                                                                                                                                                                                                                                                                                                                                                                                                                                                                                                                                                                                                                                                                                                                                                                                                                                                                                                                        |
| <b>Gestione sperimentale (ERAS)</b>                           | <p>Per ciascun gruppo di circa 4-6 centri nel trimestre precedente la data di attivazione del protocollo verrà effettuata un'approfondita formazione in merito ai principi ERAS e al nuovo protocollo ERAS-POIS (allegato n.1). La formazione si articolerà in un corso della durata di una giornata gestito da esperti formatori POIS.</p> <p>Ciascun centro aderente dovrà identificare, oltre al direttore della struttura e al coordinatore infermieristico, un professionista di riferimento per ciascuna figura professionale coinvolta nel progetto (chirurgo-anestesista-infermiere-dietologo/dietista, medico di direzione sanitaria). Il "TEAM ERAS" regionale parteciperà alla formazione e si renderà successivamente disponibile per</p>                                                                                                                                                                                                                                                                                                                                                                                                                                                                                                                                                                                                                                                                                                                                                                                                                                                                                                                                                                                                                                                                                            |

|                                                              |                                                                                                                                                                                                                                                                                                                                                                                                                                                                                                                                                                                                                                                                                                                                                                                                                                                                                                                                                                                                                                                                                                                                                                                                                                                                                                                                                                                                                                                                                                                                                                                                                                                                                                                                                                                                                                                                                       |
|--------------------------------------------------------------|---------------------------------------------------------------------------------------------------------------------------------------------------------------------------------------------------------------------------------------------------------------------------------------------------------------------------------------------------------------------------------------------------------------------------------------------------------------------------------------------------------------------------------------------------------------------------------------------------------------------------------------------------------------------------------------------------------------------------------------------------------------------------------------------------------------------------------------------------------------------------------------------------------------------------------------------------------------------------------------------------------------------------------------------------------------------------------------------------------------------------------------------------------------------------------------------------------------------------------------------------------------------------------------------------------------------------------------------------------------------------------------------------------------------------------------------------------------------------------------------------------------------------------------------------------------------------------------------------------------------------------------------------------------------------------------------------------------------------------------------------------------------------------------------------------------------------------------------------------------------------------------|
|                                                              | approfondimenti e fornire supporto all'implementazione locale del protocollo e alla formazione.                                                                                                                                                                                                                                                                                                                                                                                                                                                                                                                                                                                                                                                                                                                                                                                                                                                                                                                                                                                                                                                                                                                                                                                                                                                                                                                                                                                                                                                                                                                                                                                                                                                                                                                                                                                       |
| <b>Endpoint</b>                                              | <p>Primario:</p> <ul style="list-style-type: none"> <li>durata media della degenza, calcolata escludendo le durate superiori ad una soglia predefinita di 22 giorni (corrispondente al 94° percentile della distribuzione delle durate di degenza nel 2018).</li> </ul> <p>Secondari:</p> <ul style="list-style-type: none"> <li>incidenza di complicanze post chirurgiche nel post-operatorio, definite secondo la classificazione Clavien-Dindo</li> <li>trasferimenti in terapia intensiva nel post-operatorio</li> <li>percentuale di degenze di durata superiore alla soglia (<math>\geq 12</math> giorni)</li> <li>percentuale di reinterventi (entro lo stesso ricovero o comunque nei 30 giorni successivi all'intervento)</li> <li>percentuale di accessi in PS entro 30 giorni dall'intervento (indipendentemente dal motivo e dall'eventuale ricovero)</li> <li>percentuale di riammissioni in ospedale entro 30 giorni dall'intervento (indipendentemente dal motivo)</li> <li>percentuale di interventi eseguiti con tecnica laparoscopica</li> <li>score di qualità del recupero post-operatorio (misurato con il questionario QoR-15 [18] a circa 24 ore dall'intervento)</li> <li>score di soddisfazione percepita dei pazienti misurato con il questionario SSQ-8 [19] tramite intervista telefonica a due settimane dalla dimissione (solo per un campione di pazienti o in alternativa loro caregivers che accettino di essere intervistati)</li> <li>valutazione della soddisfazione degli operatori, rilevata in modo qualitativo attraverso focus group, al termine della sperimentazione</li> <li>costi medi assistenziali, calcolati dal pre-ricovero fino a 30 giorni dopo l'intervento.</li> </ul>                                                                                                                                                          |
| <b>Metodi e strumenti di raccolta dei dati e di feedback</b> | <p>Prima dell'avvio dello studio tutti i centri saranno abilitati ad inserire i dati dei pazienti sottoposti a chirurgia colo-rettale inclusi nello studio in un'area dedicata su una piattaforma elettronica (sviluppata e gestita dalla SSD Epidemiologia Clinica e Valutativa - CPO della CSS di Torino). Nel database saranno registrati in modo prospettico e dopo anonimizzazione reversibile i dati relativi alla gestione del peri-operatorio di tutti i pazienti sottoposti a interventi programmati chirurgia colo-rettale per neoplasie che avranno accettato di rendere disponibili i loro dati ai fini dello studio sottoscrivendo un modulo di consenso, dopo aver ricevuto adeguata informazione scritta ed orale nel periodo del pre-ricovero. La scheda raccolta dati (Case Report Form – CRF) è riportata nell'allegato 2.</p> <p>I componenti del TEAM ERAS di ciascun centro avranno accesso a tale piattaforma attraverso ID e password individuali e potranno visualizzare e modificare soltanto i dati relativi ai propri pazienti. Il database sarà sviluppato rispettando tutti i requisiti di sicurezza previsti dalla GDPR (regolamento EU 2016/679) in vigore dal 25/5/2018 e successive modificazioni</p> <p>Pertanto, dopo l'avvio dello studio (che avverrà contemporaneamente in tutti i centri), ciascun centro registrerà sulla piattaforma web i dati relativi alla gestione standard dei propri pazienti candidati ad intervento di chirurgia colo-rettale. Successivamente, in base al calendario di attivazione del protocollo ERAS in ciascun centro, il team abilitato del reparto avrà anche accesso alla sezione di monitoring dell'area nella quale saranno disponibili, con aggiornamento contemporaneo al caricamento dei dati, grafici con i principali endpoint dello studio, informativi sull'andamento generale del protocollo a</p> |

|                                                                               |                                                                                                                                                                                                                                                                                                                                                                                                                                                                                                                                                                                                                                                                                                                                                                                                                                                                                                                                                                                                                                                                                                                                                                                                                                                                                                                                                                                                                                                                                                                                                                                                                                                                                                                                                                                                                                                                                                                                                                                                                                                                                                                                                                                                                                                                                                                                                                                                                                                                                                                                                                                                                                                                                                                                                                                                                   |
|-------------------------------------------------------------------------------|-------------------------------------------------------------------------------------------------------------------------------------------------------------------------------------------------------------------------------------------------------------------------------------------------------------------------------------------------------------------------------------------------------------------------------------------------------------------------------------------------------------------------------------------------------------------------------------------------------------------------------------------------------------------------------------------------------------------------------------------------------------------------------------------------------------------------------------------------------------------------------------------------------------------------------------------------------------------------------------------------------------------------------------------------------------------------------------------------------------------------------------------------------------------------------------------------------------------------------------------------------------------------------------------------------------------------------------------------------------------------------------------------------------------------------------------------------------------------------------------------------------------------------------------------------------------------------------------------------------------------------------------------------------------------------------------------------------------------------------------------------------------------------------------------------------------------------------------------------------------------------------------------------------------------------------------------------------------------------------------------------------------------------------------------------------------------------------------------------------------------------------------------------------------------------------------------------------------------------------------------------------------------------------------------------------------------------------------------------------------------------------------------------------------------------------------------------------------------------------------------------------------------------------------------------------------------------------------------------------------------------------------------------------------------------------------------------------------------------------------------------------------------------------------------------------------|
|                                                                               | <p>livello regionale e del centro specifico. Questa forma di feedback, centrata su indicatori di processo (aderenza della pratica clinica alle procedure previste nel protocollo ERAS) e di esito (durata della degenza, endpoint secondari) dovrebbe consentire a ciascun reparto l'identificazione puntuale e tempestiva delle criticità per poter indirizzare gli eventuali interventi correttivi.</p> <p>Il recupero post-operatorio sarà misurato a circa 24 ore dall'intervento attraverso il questionario QoR-15 (disponibile e validato in lingua inglese). La versione in italiano è stata ottenuta attraverso un processo di traduzione e retro traduzione ("forward/backward translation") e successiva validazione su un primo campione di pazienti (allegato n.3). A tal fine verrà somministrato ai pazienti anche una visual analog scale (VAS), con scala compresa tra "recupero scadente" e "recupero eccellente", come misura sintetica della qualità del di recupero.</p> <p>La soddisfazione percepita dai pazienti sarà misurata attraverso il questionario SSQ-8, somministrato telefonicamente ad un campione di pazienti o in alternativa loro caregivers dopo due settimane dalla dimissione, da personale esperto nella somministrazione di questionari a contenuto sanitario. Poiché il questionario, validato e disponibile in lingua inglese, non è disponibile in lingua italiana, la versione italiana è stata ottenuta attraverso un processo di traduzione e retro traduzione ("forward/backward translation") e successiva validazione su un primo campione di pazienti, attraverso la correlazione con complicanze, reinterventi, accessi in PS e riammissioni (allegato n.4).</p> <p>La valutazione della soddisfazione degli operatori sarà effettuata attraverso questionari e, in modo qualitativo, attraverso la conduzione di focus group, nella fase conclusiva della sperimentazione, coinvolgendo separatamente i diversi gruppi di professionisti (infermieri, chirurghi, anestesisti). I focus group saranno condotti da personale esperto.</p> <p>I costi assistenziali saranno valutati includendo le seguenti categorie di risorse: visite pre-intervento, giornate di degenza (incluse giornate in terapia intensiva), tipologia di intervento, trattamento delle complicanze, reinterventi, accessi in PS, nuovi ricoveri.</p> <p>Per la valutazione dei fattori organizzativi e strutturali dei reparti associati alla compliance al protocollo ERAS si intende somministrare ai centri partecipanti un breve questionario, in concomitanza dello svolgimento dei corsi di formazione, al fine di raccogliere alcune informazioni di contesto (dimensioni del reparto, organizzazione, conoscenza e predisposizione verso il protocollo ERAS, criticità).</p> |
| <p><b>Considerazioni statistiche su numerosità e potenza dello studio</b></p> | <p>Tenuto conto che nel 2018 gli ospedali che hanno eseguito almeno 30 interventi programmati per tumori del colon-retto sono stati 32 e che almeno 4 ospedali hanno già implementato il protocollo ERAS, il totale degli ospedali inclusi nella sperimentazione sono 28, con una media di circa 64 interventi/anno (16 per ospedale a trimestre e 1790 interventi totali attesi in regione in 12 mesi). Con un calendario di attivazione che prevede un gruppo di 7 ospedali ogni trimestre, sono necessari 4 periodi (15 mesi in totale) per completare l'implementazione su tutti i centri in regione.</p> <p>Lo schema della tabella seguente riporta una possibile sequenza di attivazione dei cluster nel corso dello studio con la numerosità dei centri e dei pazienti per il periodo di controllo e sperimentale. Con questa ipotesi di numerosità totale attesa in 15 mesi (n=2240, di cui circa 1120 interventi nel periodo di controllo e 1120 nel periodo sperimentale) e di disegno è stata calcolata la potenza statistica dello studio sia per l'endpoint principale (durata della degenza), sia per gli endpoint dicotomici.</p>                                                                                                                                                                                                                                                                                                                                                                                                                                                                                                                                                                                                                                                                                                                                                                                                                                                                                                                                                                                                                                                                                                                                                                                                                                                                                                                                                                                                                                                                                                                                                                                                                                                                 |

|                            | <p>Per il calcolo della potenza statistica dello studio è stato applicato il metodo di Hemming e Girling utilizzando il software STATA (v. 13).<br/>La potenza è stata calcolata ipotizzando che l'applicazione del protocollo comporti una riduzione della durata media della degenza (calcolata dopo aver escluso le degenze &gt;22 giorni, corrispondenti al 94° percentile) di almeno 1 giorno (da 9.0 a 8.0) per essere definito efficace, che in relazione alla deviazione standard (3.7) rappresenta un effect size di circa 0.26.</p> <p>I parametri utilizzati per il calcolo sono:<br/> Degenza media (standard): 9.0 giorni (DS: 3.7)<br/> Degenza media (sperimentale): ≤ 8.0 giorni (DS 3.7)<br/> Errore alfa (due code): 0.05<br/> Coefficiente di correlazione entro cluster (ICC): 0.20<br/> Numerosità media dei cluster: 16<br/> Numero di cluster randomizzati per step: 7<br/> Numero di step (escluso il baseline): 4</p> <p>Numerosità totale dello studio: 2240<br/> Potenza statistica: 0.98</p> <p>È stata anche calcolata la potenza statistica dello studio per evidenziare come statisticamente significative differenze assolute di almeno 10% degli endpoint secondari misurabili come percentuali (es. aderenza al protocollo ERAS, complicanze, reinterventi, ecc...). Assumendo un valore di riferimento pari a 0.5 (valore più sfavorevole da un punto di vista statistico), e mantenendo tutti i parametri precedenti, lo studio ha una potenza di 0.84.</p> |     |        |     |     |        |    |        |        |     |     |     |     |     |  |        |     |     |     |     |     |  |        |     |     |     |     |     |  |        |     |     |     |     |     |  |                         |  |  |  |  |  |  |                           |     |     |     |     |   |      |                           |   |     |     |     |     |      |
|----------------------------|-------------------------------------------------------------------------------------------------------------------------------------------------------------------------------------------------------------------------------------------------------------------------------------------------------------------------------------------------------------------------------------------------------------------------------------------------------------------------------------------------------------------------------------------------------------------------------------------------------------------------------------------------------------------------------------------------------------------------------------------------------------------------------------------------------------------------------------------------------------------------------------------------------------------------------------------------------------------------------------------------------------------------------------------------------------------------------------------------------------------------------------------------------------------------------------------------------------------------------------------------------------------------------------------------------------------------------------------------------------------------------------------------------------------------------------------------------------------------------------------------|-----|--------|-----|-----|--------|----|--------|--------|-----|-----|-----|-----|-----|--|--------|-----|-----|-----|-----|-----|--|--------|-----|-----|-----|-----|-----|--|--------|-----|-----|-----|-----|-----|--|-------------------------|--|--|--|--|--|--|---------------------------|-----|-----|-----|-----|---|------|---------------------------|---|-----|-----|-----|-----|------|
|                            | <table border="1"> <thead> <tr> <th></th> <th>mesi 0</th> <th>3</th> <th>6</th> <th>9</th> <th>12</th> <th>Totale</th> </tr> </thead> <tbody> <tr> <td>Step 4</td> <td>112</td> <td>112</td> <td>112</td> <td>112</td> <td>112</td> <td></td> </tr> <tr> <td>Step 3</td> <td>112</td> <td>112</td> <td>112</td> <td>112</td> <td>112</td> <td></td> </tr> <tr> <td>Step 2</td> <td>112</td> <td>112</td> <td>112</td> <td>112</td> <td>112</td> <td></td> </tr> <tr> <td>Step 1</td> <td>112</td> <td>112</td> <td>112</td> <td>112</td> <td>112</td> <td></td> </tr> <tr> <td>Numerosità per periodo:</td> <td></td> <td></td> <td></td> <td></td> <td></td> <td></td> </tr> <tr> <td>• pazienti (di controllo)</td> <td>448</td> <td>336</td> <td>224</td> <td>112</td> <td>0</td> <td>1120</td> </tr> <tr> <td>• pazienti (sperimentali)</td> <td>0</td> <td>112</td> <td>224</td> <td>336</td> <td>448</td> <td>1120</td> </tr> </tbody> </table>                                                                                                                                                                                                                                                                                                                                                                                                                                                                                                                                           |     | mesi 0 | 3   | 6   | 9      | 12 | Totale | Step 4 | 112 | 112 | 112 | 112 | 112 |  | Step 3 | 112 | 112 | 112 | 112 | 112 |  | Step 2 | 112 | 112 | 112 | 112 | 112 |  | Step 1 | 112 | 112 | 112 | 112 | 112 |  | Numerosità per periodo: |  |  |  |  |  |  | • pazienti (di controllo) | 448 | 336 | 224 | 112 | 0 | 1120 | • pazienti (sperimentali) | 0 | 112 | 224 | 336 | 448 | 1120 |
|                            | mesi 0                                                                                                                                                                                                                                                                                                                                                                                                                                                                                                                                                                                                                                                                                                                                                                                                                                                                                                                                                                                                                                                                                                                                                                                                                                                                                                                                                                                                                                                                                          | 3   | 6      | 9   | 12  | Totale |    |        |        |     |     |     |     |     |  |        |     |     |     |     |     |  |        |     |     |     |     |     |  |        |     |     |     |     |     |  |                         |  |  |  |  |  |  |                           |     |     |     |     |   |      |                           |   |     |     |     |     |      |
| Step 4                     | 112                                                                                                                                                                                                                                                                                                                                                                                                                                                                                                                                                                                                                                                                                                                                                                                                                                                                                                                                                                                                                                                                                                                                                                                                                                                                                                                                                                                                                                                                                             | 112 | 112    | 112 | 112 |        |    |        |        |     |     |     |     |     |  |        |     |     |     |     |     |  |        |     |     |     |     |     |  |        |     |     |     |     |     |  |                         |  |  |  |  |  |  |                           |     |     |     |     |   |      |                           |   |     |     |     |     |      |
| Step 3                     | 112                                                                                                                                                                                                                                                                                                                                                                                                                                                                                                                                                                                                                                                                                                                                                                                                                                                                                                                                                                                                                                                                                                                                                                                                                                                                                                                                                                                                                                                                                             | 112 | 112    | 112 | 112 |        |    |        |        |     |     |     |     |     |  |        |     |     |     |     |     |  |        |     |     |     |     |     |  |        |     |     |     |     |     |  |                         |  |  |  |  |  |  |                           |     |     |     |     |   |      |                           |   |     |     |     |     |      |
| Step 2                     | 112                                                                                                                                                                                                                                                                                                                                                                                                                                                                                                                                                                                                                                                                                                                                                                                                                                                                                                                                                                                                                                                                                                                                                                                                                                                                                                                                                                                                                                                                                             | 112 | 112    | 112 | 112 |        |    |        |        |     |     |     |     |     |  |        |     |     |     |     |     |  |        |     |     |     |     |     |  |        |     |     |     |     |     |  |                         |  |  |  |  |  |  |                           |     |     |     |     |   |      |                           |   |     |     |     |     |      |
| Step 1                     | 112                                                                                                                                                                                                                                                                                                                                                                                                                                                                                                                                                                                                                                                                                                                                                                                                                                                                                                                                                                                                                                                                                                                                                                                                                                                                                                                                                                                                                                                                                             | 112 | 112    | 112 | 112 |        |    |        |        |     |     |     |     |     |  |        |     |     |     |     |     |  |        |     |     |     |     |     |  |        |     |     |     |     |     |  |                         |  |  |  |  |  |  |                           |     |     |     |     |   |      |                           |   |     |     |     |     |      |
| Numerosità per periodo:    |                                                                                                                                                                                                                                                                                                                                                                                                                                                                                                                                                                                                                                                                                                                                                                                                                                                                                                                                                                                                                                                                                                                                                                                                                                                                                                                                                                                                                                                                                                 |     |        |     |     |        |    |        |        |     |     |     |     |     |  |        |     |     |     |     |     |  |        |     |     |     |     |     |  |        |     |     |     |     |     |  |                         |  |  |  |  |  |  |                           |     |     |     |     |   |      |                           |   |     |     |     |     |      |
| • pazienti (di controllo)  | 448                                                                                                                                                                                                                                                                                                                                                                                                                                                                                                                                                                                                                                                                                                                                                                                                                                                                                                                                                                                                                                                                                                                                                                                                                                                                                                                                                                                                                                                                                             | 336 | 224    | 112 | 0   | 1120   |    |        |        |     |     |     |     |     |  |        |     |     |     |     |     |  |        |     |     |     |     |     |  |        |     |     |     |     |     |  |                         |  |  |  |  |  |  |                           |     |     |     |     |   |      |                           |   |     |     |     |     |      |
| • pazienti (sperimentali)  | 0                                                                                                                                                                                                                                                                                                                                                                                                                                                                                                                                                                                                                                                                                                                                                                                                                                                                                                                                                                                                                                                                                                                                                                                                                                                                                                                                                                                                                                                                                               | 112 | 224    | 336 | 448 | 1120   |    |        |        |     |     |     |     |     |  |        |     |     |     |     |     |  |        |     |     |     |     |     |  |        |     |     |     |     |     |  |                         |  |  |  |  |  |  |                           |     |     |     |     |   |      |                           |   |     |     |     |     |      |
| <b>Analisi Statistiche</b> | <p>Le degenze medie (calcolate escludendo le durate maggiori della soglia) saranno confrontate tra i periodi con e senza implementazione del protocollo ERAS usando modelli di regressione lineare ad effetti casuali. Nel modello, la degenza verrà trattata come variabile dipendente mentre tra le indipendenti una variabile dicotomica indicherà per ciascun centro l'implementazione del protocollo nel periodo di riferimento della degenza. L'effetto dell'implementazione del protocollo ERAS sulla degenza media verrà aggiustato includendo nel modello le variabili tempo (identificato dagli step previsti), la sede del tumore (colon, retto) e la tecnica chirurgica (LPT, LPS). Il centro verrà incluso nel modello come effetto casuale. Per gli endpoint dicotomici misurati come proporzioni (es. durate di degenza superiori alla soglia, complicanze, riammissioni in ospedale) si stimerà l'effetto dell'implementazione del protocollo ERAS con modelli di regressione logistica ad effetti casuali, utilizzando un indicatore dell'evento (0, 1) come variabile dipendente e includendo nel modello lo stesso set di covariate utilizzato per l'analisi della durata di degenza.</p>                                                                                                                                                                                                                                                                                    |     |        |     |     |        |    |        |        |     |     |     |     |     |  |        |     |     |     |     |     |  |        |     |     |     |     |     |  |        |     |     |     |     |     |  |                         |  |  |  |  |  |  |                           |     |     |     |     |   |      |                           |   |     |     |     |     |      |

|                     |                                                                                                                                                                                                                                                                                                                                                                                                                                                                                                                                                                                                                                                                                                                                                                                                                                                                                                                                                                                                                                                                                                                                                                                                                                                                                                                                                                                                                                                                                                                                                                                                                                                                                                                                                                                                                                                                                                                                                                                  |
|---------------------|----------------------------------------------------------------------------------------------------------------------------------------------------------------------------------------------------------------------------------------------------------------------------------------------------------------------------------------------------------------------------------------------------------------------------------------------------------------------------------------------------------------------------------------------------------------------------------------------------------------------------------------------------------------------------------------------------------------------------------------------------------------------------------------------------------------------------------------------------------------------------------------------------------------------------------------------------------------------------------------------------------------------------------------------------------------------------------------------------------------------------------------------------------------------------------------------------------------------------------------------------------------------------------------------------------------------------------------------------------------------------------------------------------------------------------------------------------------------------------------------------------------------------------------------------------------------------------------------------------------------------------------------------------------------------------------------------------------------------------------------------------------------------------------------------------------------------------------------------------------------------------------------------------------------------------------------------------------------------------|
|                     | <p>Le analisi principali saranno stratificate per caratteristiche dei centri (classificati per volume di attività, per grado di aderenza al protocollo ERAS al baseline e per altre caratteristiche strutturali) e dei pazienti (classi di età, diagnosi, tecnica chirurgica utilizzata). Dall'analisi principale saranno esclusi a posteriori i centri con elevata aderenza al protocollo ERAS al baseline.</p> <p>Per ridurre il rischio di bias dovuto ad una inclusione selezionata di pazienti nello studio da parte dei centri (selection bias, valutato in base alla percentuale di casi inseriti sul totale delle schede di dimissione dello stesso periodo di arruolamento), si stratificheranno le analisi per completezza dell'arruolamento (con possibilità di esclusione dei centri con maggiore incompletezza).</p> <p>Per tenere conto del periodo di adattamento in ciascun centro è prevista un'analisi di sensibilità che escluderà dal confronto il primo mese di ogni periodo di attivazione del protocollo ERAS.</p> <p>L'impatto del protocollo ERAS sarà anche analizzato in funzione del tempo trascorso dalla sua introduzione per valutare la curva di raggiungimento di un livello accettabile ed ottimale di applicazione.</p> <p>Come analisi secondaria si valuterà l'endpoint principale dello studio sull'intera casistica regionale rilevabile attraverso le schede di dimissione ospedaliera della regione Piemonte, selezionando i pazienti con i criteri di inclusione dello studio.</p> <p>Inoltre, si prevede di valutare l'andamento nel tempo della durata media della degenza rilevabile attraverso le schede di dimissione ospedaliera nei 5 anni precedenti l'attivazione del protocollo ERAS e nell'anno successivo, attraverso un disegno a serie temporali interrotte.</p>                                                                                                                                                         |
| <b>Bibliografia</b> | <ol style="list-style-type: none"> <li>1) Kehlet H and Wilmore DW: Evidence-based surgical care and the evolution of fast-track surgery. <i>Ann Surg</i> 248(2): 189-198, 2008</li> <li>2) Ansari D, Gianotti L, Schroder J and Andersson R: Fast-track surgery: procedure-specific aspects and future direction. <i>Langenbecks Arch Surg</i> 398(1): 29-37, 2013.</li> <li>3) O. Ljungqvist, M. Scott, K.C. Fearon, Enhanced recovery after surgery: a review, <i>JAMA Surg.</i> 152 (3) (2017 Mar 1) 292–298</li> <li>4) Visioni, R. Shah, E. Gabriel, K. Attwood, M. Kukar, S. Nurkin, Enhanced recovery after surgery for noncolorectal surgery?: a systematic review and meta-analysis of major abdominal surgery, <i>Ann. Surg.</i> (2017) (Epub ahead of print).</li> <li>5) O. Ljungqvist, N.X. Thanh, G. Nelson, ERAS - value based surgery, <i>J. Surg. Oncol.</i> (2017 Sep 5) (Epub ahead of print).</li> <li>6) Spanjersberg WR, Reurings J, Keus F and van Laarhoven CJ: Fast track surgery versus conventional recovery strategies for colorectal surgery. <i>Cochrane Database Syst Rev</i> 2, 2011.</li> <li>7) Zhuang CL, Ye XZ, Zhang XD, Chen BC and Yu Z: Enhanced recovery after surgery programs versus traditional care for colorectal surgery: a meta-analysis of randomized controlled trials. <i>Dis Colon Rectum</i> 56(5): 667-678, 2013.</li> <li>8) Gustafsson UO, Scott MJ, Schwenk W, Demartines N, Roulin D, Francis N, McNaught CE, MacFie J, Liberman AS, Soop M, Hill A, Kennedy RH, Lobo DN, Fearon K, Ljungqvist O. Guidelines for perioperative care in elective colonic surgery: Enhanced Recovery After Surgery (ERAS) Society recommendations. <i>Clinical Nutrition</i> 2012(31):783-800.</li> <li>9) Nygren J, Thacker J, Carli F, Fearon K, Norderval S, Lobo DN, Ljungqvist O, Soop M, Ramirez J. Guidelines for perioperative care in elective rectal/pelvic surgery: Enhanced Recovery After Surgery (ERAS) Society</li> </ol> |

|  |                                                                                                                                                                                                                                                                                                                                                                                                                                                                                                                                                                                                                                                                                                                                                                                                                                                                                                                                                                                                                                                                                                                                                                                                                                                                                                                                                                                                                                                                                                                                                                                                                                                                                                                                                                                                                                                                                                                                                                                                                                                                                                                                                                                                                                                                                                                                                                                                                                                                                                                                                                                                                                                                                                                                                                                                                                                                                                                                                                                                                                                                                                                                                                                                                                                                                                                                                                                                                                                                                                                                                                                                                                                                               |
|--|-------------------------------------------------------------------------------------------------------------------------------------------------------------------------------------------------------------------------------------------------------------------------------------------------------------------------------------------------------------------------------------------------------------------------------------------------------------------------------------------------------------------------------------------------------------------------------------------------------------------------------------------------------------------------------------------------------------------------------------------------------------------------------------------------------------------------------------------------------------------------------------------------------------------------------------------------------------------------------------------------------------------------------------------------------------------------------------------------------------------------------------------------------------------------------------------------------------------------------------------------------------------------------------------------------------------------------------------------------------------------------------------------------------------------------------------------------------------------------------------------------------------------------------------------------------------------------------------------------------------------------------------------------------------------------------------------------------------------------------------------------------------------------------------------------------------------------------------------------------------------------------------------------------------------------------------------------------------------------------------------------------------------------------------------------------------------------------------------------------------------------------------------------------------------------------------------------------------------------------------------------------------------------------------------------------------------------------------------------------------------------------------------------------------------------------------------------------------------------------------------------------------------------------------------------------------------------------------------------------------------------------------------------------------------------------------------------------------------------------------------------------------------------------------------------------------------------------------------------------------------------------------------------------------------------------------------------------------------------------------------------------------------------------------------------------------------------------------------------------------------------------------------------------------------------------------------------------------------------------------------------------------------------------------------------------------------------------------------------------------------------------------------------------------------------------------------------------------------------------------------------------------------------------------------------------------------------------------------------------------------------------------------------------------------------|
|  | <p>recommendations. <i>Clinical Nutrition</i> 2012(31): 801-816.</p> <p>10) Nelson G, Altman AD, Nick A, Meyer LA, Ramirez PT, Ahtari C, Antrobus J, Huang J, Scott M, Wijk L, Acheson N, Ljungqvist O, Dowdy SC. Guidelines for pre- and intra-operative care in gynecologic/oncology surgery: Enhanced Recovery After Surgery (ERAS) Society recommendations--Part I. <i>Gynecol Oncol.</i> 2016 Feb;140(2):313-22.</p> <p>11) Nelson G, Altman AD, Nick A, Meyer LA, Ramirez PT, Ahtari C, Antrobus J, Huang J, Scott M, Wijk L, Acheson N, Ljungqvist O, Dowdy SC. Guidelines for postoperative care in gynecologic/oncology surgery: Enhanced Recovery After Surgery (ERAS) Society recommendations--Part II. <i>Gynecol Oncol.</i> 2016 Feb;140(2):323-32.</p> <p>12) Greco M, Capretti G, Beretta L, Gemma M, Pecorelli N, Braga M. Enhanced Recovery Program in Colorectal Surgery: A Meta-analysis of Randomized Controlled Trials. <i>World J Surg</i> 2014;38:1531-1541</p> <p>13) Thanh NX, Chuck AW, Wasylak T, Lawrence J, Faris P, Ljungqvist O, Nelson G Gramlich LM. An economic evaluation of the Enhanced Recovery After Surgery (ERAS) multisite implementation program for colorectal surgery in Alberta. <i>Can J Surg</i> Dec 2016;59(6):415-421</p> <p>14) On behalf of the ERAS Compliance Group. The Impact of Enhanced Recovery Protocol Compliance on Elective Colorectal Cancer Resection. Results From an International Registry. <i>Ann Surg</i> 2015;261:1153-1159</p> <p>15) Braga M, Borghi F, Scatizzi M, Missana G, Guicciardi MA, Bona S, Ficari F, Maspero M, Pecorelli N; PeriOperative Italian Society. Impact of laparoscopy on adherence to an enhanced recovery pathway and readiness for discharge in elective colorectal surgery: Results from the PeriOperative Italian Society registry. <i>Surg Endosc.</i> 2017 Nov;31(11):4393-4399.</p> <p>16) Braga M, Beretta L, Pecorelli N, Maspero M, Casiraghi U, Borghi F, Pellegrino L, Bona S, Monzani R, Ferrari G, Radrizzani D, Iuliani R, Bima C, Scatizzi M, Missana G, Guicciardi MA, Muratore A, Crespi M, Bouzari H, Ceretti AP, Ficari F; PeriOperative Italian Society Group. Enhanced recovery pathway in elderly patients undergoing colorectal surgery: is there an effect of increasing ages? Results from the perioperative Italian Society Registry. <i>Updates Surg.</i> 2017 Jun</p> <p>17) Braga M, Pecorelli N, Scatizzi M, Borghi F, Missana G, Radrizzani D; PeriOperative Italian Society. Enhanced Recovery Program in High-Risk Patients Undergoing Colorectal Surgery: Results from the PeriOperative Italian Society Registry. <i>World J Surg.</i> 2017 Mar;41(3):860-867.</p> <p>18) Stark PA, Myles PS, Burke JA. Development and psychometric evaluation of a postoperative quality of recovery score: the QoR-15. <i>Anesthesiology.</i> 2013 Jun;118(6):1332-40.</p> <p>19) Murphy M, Sternschuss G, Haff R, van Raalte H, Saltz S, Lucente V. Quality of life and surgical satisfaction after vaginal reconstructive vs obliterative surgery for the treatment of advanced pelvic organ prolapse. <i>Am J Obstet Gynecol.</i> 2008 May;198(5):573.e1-7</p> <p>20) Gustafsson UO, Scott MJ, Hubner M, Nygren J, Demartines N, Francis N, Rockall TA, Young-Fadok TM, Hill AG, Soop M, de Boer HD, Urman RD, Chang GJ, Fichera A, Kessler H, Grass F, Whang EE, Fawcett WJ, Carli F, Lobo DN, Rollins KE, Balfour A, Baldini G, Riedel B, Ljungqvist O. Guidelines for Perioperative Care in Elective Colorectal Surgery: Enhanced Recovery After Surgery (ERAS®) Society Recommendations: 2018. <i>World J Surg.</i> 2019 Mar;43(3):659-695.</p> |
|--|-------------------------------------------------------------------------------------------------------------------------------------------------------------------------------------------------------------------------------------------------------------------------------------------------------------------------------------------------------------------------------------------------------------------------------------------------------------------------------------------------------------------------------------------------------------------------------------------------------------------------------------------------------------------------------------------------------------------------------------------------------------------------------------------------------------------------------------------------------------------------------------------------------------------------------------------------------------------------------------------------------------------------------------------------------------------------------------------------------------------------------------------------------------------------------------------------------------------------------------------------------------------------------------------------------------------------------------------------------------------------------------------------------------------------------------------------------------------------------------------------------------------------------------------------------------------------------------------------------------------------------------------------------------------------------------------------------------------------------------------------------------------------------------------------------------------------------------------------------------------------------------------------------------------------------------------------------------------------------------------------------------------------------------------------------------------------------------------------------------------------------------------------------------------------------------------------------------------------------------------------------------------------------------------------------------------------------------------------------------------------------------------------------------------------------------------------------------------------------------------------------------------------------------------------------------------------------------------------------------------------------------------------------------------------------------------------------------------------------------------------------------------------------------------------------------------------------------------------------------------------------------------------------------------------------------------------------------------------------------------------------------------------------------------------------------------------------------------------------------------------------------------------------------------------------------------------------------------------------------------------------------------------------------------------------------------------------------------------------------------------------------------------------------------------------------------------------------------------------------------------------------------------------------------------------------------------------------------------------------------------------------------------------------------------------|

## **Allegato 1 - Protocollo ERAS per la gestione perioperatoria dei pazienti sottoposti a resezione colo-rettale per neoplasia.**

### **Criteri di inclusione**

- Il protocollo ERAS trova applicazione per tutti i pazienti candidati a chirurgia resettiva colo-rettale per patologia maligna, sia con approccio open che laparoscopico.

### **Criteri di esclusione**

- ASA V.
- Interventi di resezione colo rettale eseguiti per patologia benigna.
- Procedure chirurgiche eseguite in regime di urgenza.

### **Valutazione e informazione pre-operatoria**

#### *- Valutazione anestesiológica*

Visita anestesiológica da eseguire almeno 2 settimane prima dell' intervento chirurgico per stabilizzazione delle eventuali condizioni cliniche: malattie cardiologiche, anemia, BPCO, diabete, stati di carenze nutrizionale. Invitare inoltre con adeguato supporto l'astensione dal fumo e alcol. Qualora il paziente presenti un'anamnesi positiva per patologia respiratoria severa (BPCO, asma, sindrome delle apnee notturne), con un quadro clinico non compensato, è indicato richiedere una valutazione clinico-strumentale della funzionalità respiratoria, volta all'identificazione dei soggetti che potrebbero beneficiare di un trattamento fisioterapico pre- e/o postoperatorio.

#### *- Counseling preoperatorio*

Dovrà prevedere un momento di incontro tra il paziente e il team multidisciplinare (chirurgo, anestesista e infermiere). Lo scopo è quello di favorire la compliance al protocollo, condividendo con il paziente gli obiettivi e motivandolo ad aderire al percorso delineato. A tal fine risulta utile il coinvolgimento dei familiari che parteciperanno al colloquio preoperatorio e assisteranno il paziente sia durante la degenza che una volta rientrato al domicilio. E' opportuno che il counseling avvenga con sufficiente anticipo (indicativamente almeno 2 settimane) rispetto alla data prevista del ricovero. E' consigliabile che l'incontro si svolga in ambito multidisciplinare, con la partecipazione, se possibile, contemporanea di tutti i professionisti coinvolti. Ciò consente di condividere i contenuti di educazione sanitaria ed informazione che il paziente deve ricevere, per evitare ripetizioni e finalizzare in maniera ottimale il colloquio. Anestesista e chirurgo informano il paziente sulle procedure di relativa competenza e ottengono il consenso informato. L'infermiere ha il compito di:

- effettuare la valutazione dei bisogni del paziente, incluso il rischio nutrizionale, e dei familiari;
- informare il paziente sull'organizzazione del reparto, sul personale operante e sui presidi necessari;
- informare il paziente sulla preparazione (eventuale preparazione intestinale, alimentazione, programma motorio) e sulla gestione del dolore e di eventuale nausea/vomito postoperatori.

E' consigliabile che l'informazione verbale sia integrata con la consegna del materiale informativo appositamente predisposto (opuscolo informativo in allegato n.5).

#### -Valutazione dello stato nutrizionale e prescrizioni dietetiche

- Deve essere eseguita una valutazione preoperatoria del rischio nutrizionale utilizzando il Malnutrition Universal Screening Tool (allegato n.6).
- Nei pazienti con score MUST  $\geq 1$  è indicata valutazione specialistica del Servizio di Dietetica e Nutrizione Clinica per la valutazione dello stato nutrizionale e per la terapia dietetica, compresa l'immunonutrizione.
- Per la diagnosi di malnutrizione utilizzare i criteri GLIM individuati nel documento di consenso dell'ESPEN 2018 (allegato n.7).
- In tutti i pazienti malnutriti è indicata la somministrazione preoperatoria di immunonutrizione per 5-7 giorni prima dell'intervento. Il trattamento immunonutrizionale preoperatorio consiste nella somministrazione di n°2 briks per circa 450-500ml di supplemento nutrizionale orale arricchito di immunonutrienti (arginina, acidi grassi w-3 e RNA).
- Nei pazienti malnutriti è necessario che la valutazione nutrizionale avvenga almeno 10 giorni prima dell'intervento; in caso di malnutrizione severa può essere necessario posticipare l'intervento chirurgico.
- Per valutare la compliance dei pazienti all'immunonutrizione utilizzare scheda per il monitoraggio dell'assunzione del supplemento nutrizionale preoperatorio (allegato n.8).
- Nessuna restrizione alimentare fino a 6 ore prima dell'intervento; possibilità di assumere liquidi chiari fino a 2 ore prima dell'intervento.
- Carico glucidico: somministrazione di bevanda a base di maltodestrine e priva di lipidi, lattosio, fibre e glutine. Dose: 800 cc la sera precedente l'intervento e 400 cc 2-3 ore prima dell'intervento, poi digiuno. La bevanda va assunta possibilmente fresca. L'assunzione della bevanda a base di maltodestrine non è controindicata nel paziente diabetico, ma in caso di quadro clinico non compensato è opportuna la valutazione da parte dello specialista.
- L'assunzione di liquidi chiari, incluse maltodestrine, nelle 2-3 ore prima dell'intervento è controindicata nei pazienti con rallentato svuotamento gastrico o nei quali sia prevista una difficile gestione delle vie aeree.
- La somministrazione della bevanda a base di maltodestrine nella dose di 800 cc il giorno precedente l'intervento, non sarà effettuata nei pazienti sottoposti ad immunonutrizione preoperatoria, in quanto questi pazienti continueranno l'assunzione del supplemento nutrizionale orale arricchito di immunonutrienti.

#### -Preparazione colica:

Nessuna preparazione di principio. Rectal washing la sera precedente l'intervento per i pazienti candidati a colectomia sinistra e resezione anteriore del retto alta. I pazienti candidati a resezione anteriore del retto bassa o ultra-bassa, nel caso in cui sia prevista la stomia di protezione, eseguono una preparazione colica standard per os secondo le abitudini del team. In caso di restrizioni alimentari adeguare gli apporti ai fabbisogni con integratori orali calorici/proteici/salini privi di fibre.

#### -Profilassi antitrombotica secondo le linee guida o la pratica clinica corrente dell'azienda.

#### -Profilassi antibiotica secondo le linee guida o la pratica clinica corrente dell'azienda.

#### -Prevenzione dell'anemia:

Prima dell'intervento chirurgico è opportuno tentare di correggere l'anemia secondo le linee guida o la pratica clinica corrente dell'azienda. I preparati di ferro per via endovenosa sono da preferirsi al ferro orale per ripristinare più rapidamente le



concentrazioni di emoglobina sia nell'anemia da carenza di ferro che nell'anemia da malattia cronica. La trasfusione di sangue dovrebbe essere evitata, se possibile.

### Protocollo anestesiológico

- Nessuna preanestesia di principio, evitando in particolare la somministrazione di benzodiazepine long acting.
- Nella chirurgia laparotomica il protocollo prevede il posizionamento di catetere epidurale (indicativamente a livello toracico) prima dell'induzione dell'anestesia generale. Somministrare dose test di verifica e bolo iniziale di anestetico locale.
- In chirurgia laparoscopica il posizionamento del catetere epidurale è a discrezione dell'anestesista.
- Anestesia generale inalatoria o TIVA (+ eventuale anestesia locoregionale epidurale), induzione e mantenimento con farmaci short-acting (propofol, remifentanil) e curarizzazione. Quando possibile si raccomanda l'utilizzo di monitoraggi per misurare la profondità dell'anestesia e la curarizzazione, come si raccomanda l'utilizzo di antagonisti reversal dei curari al termine dell'anestesia.
- Intubazione oro-tracheale ventilazione IPPV o Pressure support, ove necessario, con aria/O<sub>2</sub> (35/65%).
- Idratazione intraoperatoria restrittiva, 4 ml/kg/h di soluzioni cristalloidi. Mantenere una diuresi intraoperatoria di almeno 0.5 ml/kg/h. Utilizzare la Goal Directed Fluid Therapy (GDFT) nei pazienti ad alto rischio.
- Si raccomanda l'utilizzo di vasocostrittori nei pazienti normovolemici ipotesi in trattamento con analgesia peridurale.
- Prevenzione dell'ipotermia e costante monitoraggio della temperatura corporea.
- Profilassi emesi selettiva:
  - Apfel score 1-2, profilassi con 2 farmaci di prima linea;
  - Apfel score  $\geq 3$ , profilassi con 2-3 farmaci antiemetici.
- Nel caso il catetere epidurale non sia stato posizionato si prevede una analgesia multimodale preferendo strategie analgesiche opioid-sparing.
- Posizionamento catetere vescicale.
- Posizionamento sondino naso-gastrico.

### Tecnica chirurgica

- Resezione colica o coloretale secondo tecnica standard, open o laparoscopica. L'approccio laparoscopico è preferibile dove vi sia adeguata esperienza da parte degli operatori e sia tecnicamente applicabile al paziente candidato alla procedura in oggetto.
- La tecnica chirurgica deve preservare gli standard oncologici raccomandati per le patologie neoplastiche (legatura all'origine dei vasi, adeguato margine libero da malattia prossimale e distale, negatività del margine radiale mesorettale (CRM), nella chirurgia del retto con TME, numero di linfonodi adeguati per una corretta stadiazione patologica).
- Uso di incisioni chirurgiche di preferenza trasversali. In chirurgia laparoscopica, la minilaparotomia per l'estrazione del pezzo operatorio viene realizzata di preferenza in sede sovrapubica (incisione di Pfannenstiel).
- Astensione dall'uso routinario dei drenaggi salvo anastomosi extraperitoneale, anche con stomia di protezione:
  - Il posizionamento del drenaggio potrebbe essere opportuno nei casi di aumentato rischio di sanguinamento o di aumentato rischio di deiscenza (per contaminazione intraoperatoria, inadeguata vascolarizzazione, livello

dell'anastomosi, positività della prova pneumatica, motivi tecnici legati alla sutura, comorbidità del paziente, etc).

- Infiltrazione delle ferite con anestetico locale (levobupivacaina 0.5 % + fisiologica qb) al termine dell'intervento se non è stato posizionato un caterere peridurale.

### Gestione postoperatoria

- Rimozione del SNG al risveglio. L'indicazione all'eventuale riposizionamento nel postoperatorio è la persistenza del vomito malgrado adeguata terapia farmacologica multimodale (vedi paragrafo "Terapia antiemetica").
- Monitoraggio nell'immediato postoperatorio:
  - recupero delle capacità cognitive;
  - dopo intervento laparoscopico monitoraggio continuo della saturazione in respiro spontaneo per 1 ora;
  - mantenimento di ossigenoterapia a bassi flussi (2 l/min) opzionale sino al mattino seguente;
  - valutazione del dolore;
  - controllo temperatura ascellare (tempo 0/3/6 h).
- Alimentazione precoce e terapia infusioneale:
  - infusione di liquidi post-operatoria di circa 1-2 ml/kg/ora in prima giornata;
  - rimozione delle infusioni endovenose entro la prima giornata post-operatoria. Se l'alimentazione orale precoce (vedi schema seguente) non è realizzabile va mantenuta la terapia infusioneale da modificare comunque secondo l'assunzione orale di liquidi;
  - due ore dopo il risveglio dall'anestesia reintroduzione della dieta idrica;
  - la sera dell'intervento (almeno 6 ore dopo il risveglio): liquidi o dieta leggera in funzione dell'orario di fine della procedura chirurgica. Per i pazienti operati nel pomeriggio è ammesso che il primo pasto sia la colazione del mattino successivo;
  - dalla prima giornata bere idealmente sino ad un massimo di 2 litri di liquidi incrementando l'alimentazione per os (i pasti vengono consumati seduti a tavola);
  - uso di integratori orali calorico-proteici liquidi o cremosi: suggerito fino al raggiungimento dei fabbisogni calorici e proteici; per i pazienti malnutriti è indicata la somministrazione di immunonutrizione per 5 giorni post intervento;
  - procinetici (opzionale): valutare la somministrazione dall'immediato postoperatorio fino all'avvenuta canalizzazione.
  - E' utile che il paziente tenga un diario in cui registrare l'assunzione di bevande e alimenti post-intervento (allegato n.9).
- Mobilizzazione precoce:
  - il giorno dell'intervento: dopo 4 ore dal risveglio mobilizzare (seduto) con obiettivo di stare per 2 ore seduto;
  - 1<sup>a</sup> giornata: obiettivo per il paziente è restare fuori dal letto almeno 8 h e camminare;
  - 2<sup>a</sup> giornata: attività normale, non inferiore a quanto descritto per la 1<sup>a</sup> giornata.

Si raccomanda di utilizzare locali e poltrone adeguati per favorire la permanenza fuori dal letto. E' utile che il paziente tenga un diario in cui

registrare il tempo trascorso fuori dal letto ed eventualmente, fornendogli i riferimenti opportuni, la distanza percorsa camminando (esempio in allegato n.9).

- Rimozione precoce del catetere vescicale. Il catetere vescicale va rimosso all'inizio della 1<sup>a</sup> giornata post operatoria. Il catetere va mantenuto in sede nei seguenti casi:
  - Diuresi < 500 ml/24 h;
  - Resezione anteriore con anastomosi extraperitoneale (rimozione in 2<sup>a</sup> giornata).
- Analgesia:
  - Nei pazienti con catetere epidurale funzionante con infusione continua (di regola fino alla 2<sup>a</sup> giornata) l'analgesia va integrata se necessario con paracetamolo 1 g ev (max 4g/die) e, dopo rimozione del catetere epidurale, con FANS al bisogno.
  - Se il catetere epidurale non è stato posizionato si prescrivono FANS + paracetamolo ed eventualmente oppioidi minori.
  - Si sconsiglia l'uso di oppioidi maggiori che presentando effetti collaterali dose dipendente potrebbero ritardare una precoce ri-alimentazione ed aumentare le probabilità di ileo post-operatorio.
- Terapia antiemetica.
  - L'obiettivo è di non sospendere l'assunzione di liquidi e l'alimentazione per os. E' pertanto necessario un controllo ottimale dei sintomi (nausea e vomito) con terapia farmacologica multimodale (ad esempio cortisonico, ondansetron). Nei soggetti con rischio elevato di PONV (valutato in base all'Apfel score) la terapia antiemetica va prescritta di principio.

#### **Rilevazione giornaliera dei criteri " fit for discharge"**

1. Alimentazione orale tollerata.
2. Ripresa funzione intestinale.
3. Controllo del dolore con analgesici per os.
4. Autonomia motoria e nelle cure igieniche personali.
5. Non evidenza clinica / laboratoristica di complicanze postoperatorie
6. Consenso del paziente alla dimissione.

#### **Controlli post-dimissione**

- Contatto telefonico con il paziente 2-3 giorni post-dimissione.
- Visita postchirurgica nei 30-40 gg successivi all'intervento.

**Allegato 2 - Scheda raccolta dati (Case Report Form – CRF).**

File pdf allegato

**Allegato 3 - Questionario QoR-15 per valutare la qualità del recupero post-operatorio.**

File pdf Allegato

**Allegato 4: Questionario SSQ-8 per valutare la soddisfazione dei pazienti dopo la dimissione** - Versione in italiano ottenuta attraverso un processo di traduzione e retro traduzione ("forward/backward translation"), da sottoporre a validazione su un primo campione di pazienti.

**Studio ERAS  
Chirurgia coloretale**

**Questionario per valutare la soddisfazione dopo un intervento chirurgico**

*Istruzioni: di seguito sono elencate alcune domande relative al grado di soddisfazione per l'intervento chirurgico al quale si è sottoposto/a recentemente. Per piacere, indichi quale delle risposte esprime meglio la sua esperienza. Tutte le risposte sono strettamente confidenziali e coperte dal regolamento EU 269/2016.*

1. Quanto è soddisfatto/a di come è stato controllato il suo dolore dopo l'intervento mentre era in ospedale?  
 molto soddisfatto/a     soddisfatto/a     parzialmente soddisfatto/a     insoddisfatto/a     molto insoddisfatto/a
2. Quanto è soddisfatto/a di come è stato controllato il suo dolore una volta tornata a casa dopo l'intervento?  
 molto soddisfatto/a     soddisfatto/a     parzialmente soddisfatto/a     insoddisfatto/a     molto insoddisfatto/a
3. Quanto è soddisfatto/a del tempo che ha impiegato per riprendere le sue attività quotidiane, per esempio svolgere lavori domestici o attività sociali fuori casa?  
 molto soddisfatto/a     soddisfatto/a     parzialmente soddisfatto/a     insoddisfatto/a     molto insoddisfatto/a
4. Se lavora (altrimenti saltare la domanda), quanto è soddisfatto/a del tempo che ha impiegato per tornare al suo lavoro?  
 molto soddisfatto/a     soddisfatto/a     parzialmente soddisfatto/a     insoddisfatto/a     molto insoddisfatto/a
5. Quanto è soddisfatto/a del tempo che ha impiegato per riprendere la sua normale attività fisica?  
 molto soddisfatto/a     soddisfatto/a     parzialmente soddisfatto/a     insoddisfatto/a     molto insoddisfatto/a
6. Quanto è soddisfatto/a dell'assistenza ricevuta?  
 molto soddisfatto/a     soddisfatto/a     parzialmente soddisfatto/a     insoddisfatto/a     molto insoddisfatto/a
7. Quanto è soddisfatto/a delle informazioni ricevute dal personale sanitario (medico o infermieristico) sul suo intervento?  
 molto soddisfatto/a     soddisfatto/a     parzialmente soddisfatto/a     insoddisfatto/a     molto insoddisfatto/a
8. Consiglierebbe ad altre persone con lo stesso problema di farsi operare nello stesso ospedale?  
 sì     forse     non so     non credo     no

**Allegato 5 - Opuscolo informativo per i pazienti.**

File allegato .pdf

## Allegato 6 - MUST score



**BAPEN**  
www.bapen.org.uk

### 'Malnutrition Universal Screening Tool'

(Strumento di screening universale della malnutrizione)



**MAG**  
Malnutrition Advisory Group  
A Steering Committee of BAPEN

Numero di registrazione della BAPEN 1023927 www.bapen.org.uk

---

### 'MUST'

Il 'MUST' è uno strumento di screening in cinque fasi per identificare **adulti** malnutriti, a rischio di malnutrizione (sottonutrizione) od obesi. Include anche linee guida gestionali che possono essere utilizzate per sviluppare un programma terapeutico.

È adatto all'uso in ospedale, comunità e altre strutture assistenziali e può essere utilizzato da tutti gli operatori sanitari.

**Questa guida contiene:**

- Un diagramma di flusso che illustra le 5 fasi da seguire per lo screening e la gestione
- Il grafico IMC
- Tabelle del calo di peso
- Misure alternative quando non è possibile ottenere l'IMC misurando peso e altezza.

### Le 5 fasi del 'MUST'

#### Fase 1

**Misurare altezza e peso per ottenere un punteggio di IMC usando il grafico fornito. Se è impossibile ottenere l'altezza e il peso, usare le procedure alternative illustrate in questa guida.**

#### Fase 2

**Annotare il calo di peso percentuale non programmato e assegnarvi un punteggio usando le tabelle fornite.**

#### Fase 3

**Stabilire l'effetto di malattie acute e assegnarvi un punteggio.**

#### Fase 4

**Addizionare i punteggi dei passaggi 1, 2 e 3 per ottenere il rischio globale di malnutrizione.**

#### Fase 5

**Usare le linee guida gestionali e/o le politiche locali per sviluppare un programma terapeutico.**

Fare riferimento al libretto esplicativo del 'MUST' per maggiori informazioni qualora peso e altezza non possano essere misurati e nei casi in cui si effettui lo screening di gruppi di pazienti per i quali è necessaria una cautela particolare nell'interpretazione dei dati (ad es. soggetti con disturbi dei liquidi, ingessature, amputazioni, malattie critiche e donne in gravidanza o allattamento). Questo libretto può anche essere utilizzato per la formazione. Vedere il rapporto 'MUST' per prove a supporto. Si osservi che il 'MUST' non è stato progettato per rilevare carenze o apporti eccessivi di vitamine e minerali ed è adatto all'uso **solo negli adulti**.

© BAPEN



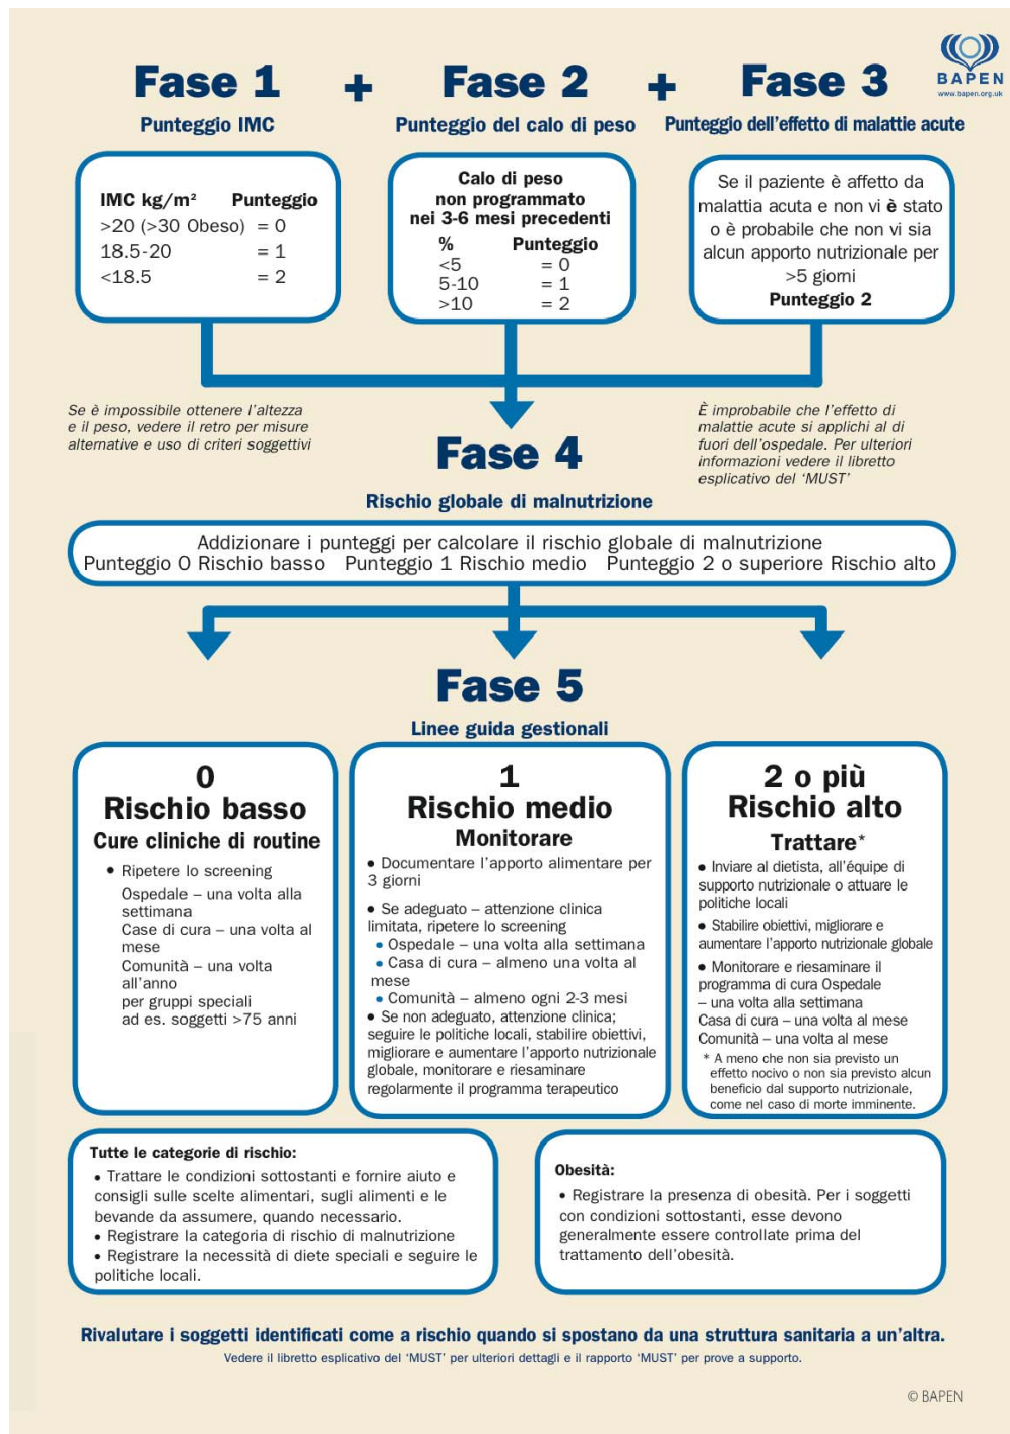

## Misure alternative e considerazioni

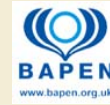

### Fase 1: IMC (Indice di massa corporea)

#### Se non è possibile misurare l'altezza

- Usare un'altezza documentata recentemente o autoriferita (se affidabile e realistica).
- Se il soggetto non conosce o non è in grado di riferire la propria altezza, usare una delle misure alternative per stimarla (ulna, altezza al ginocchio o semiampiezza delle braccia).

### Fase 2: Calo recente di peso non programmato

Se un calo di peso recente non può essere calcolato, usare il calo di peso autoriferito (se affidabile e realistico).

### Criteri soggettivi

Se non è possibile ottenere altezza, peso o IMC, i seguenti criteri a essi correlati possono facilitare un giudizio clinico sulla categoria di rischio nutrizionale del soggetto. Si osservi che questi criteri devono essere usati collettivamente e non separatamente come alternative alle fasi 1 e 2 del 'MUST' e non sono ideati per assegnare un punteggio. La circonferenza media del braccio (MUAC) può essere usata per stimare la categoria di IMC a supporto dell'impressione globale del rischio nutrizionale del soggetto.

#### 1. IMC

- Impresione clinica - magro, peso accettabile, sovrappeso. Si possono anche notare deperimento evidente (molto magro) e obesità (molto sovrappeso).

#### 2. Calo di peso non programmato

- Gli indumenti e/o i gioielli sono diventati molto larghi (calo di peso).
- Precedenti di diminuzione dell'assunzione di cibo, riduzione dell'appetito o problemi di deglutizione per 3-6 mesi e malattie sottostanti o disabilità psicosociali/fisiche che potrebbero causare un calo di peso.

#### 3. Effetto di malattie acute

- Malattia acuta e nessun apporto nutrizionale o probabilità di nessun apporto per più di 5 giorni.

Maggiori dettagli sulle misure alternative, su circostanze speciali e criteri soggettivi si possono trovare nel libretto *esplicativo del 'MUST'*. È possibile scaricarlo una copia dal sito [www.bapen.org.uk](http://www.bapen.org.uk) o acquistarla dagli uffici della BAPEN. Le prove complete a supporto del 'MUST' sono incluse nel *rapporto 'MUST'*, che può anche essere acquistato presso gli uffici della BAPEN.

BAPEN Office, Secure Hold Business Centre, Studley Road, Redditch, Worcs, B98 7LG. Tel: +44 (0)1527 45 78 50.  
Fax: +44 (0)1527 458 718. [bapen@sovereignconference.co.uk](mailto:bapen@sovereignconference.co.uk) Numero di registrazione della BAPEN 1023927. [www.bapen.org.uk](http://www.bapen.org.uk)

© BAPEN 2003 ISBN 978-1-899467-37-8 Tutti i diritti riservati. Questo documento può essere fotocopiato a scopi divulgativi e formativi nella misura in cui la fonte sia accreditata e riconosciuta.

Le copie possono essere riprodotte a fini pubblicitari e promozionali. È necessario richiedere un'autorizzazione scritta a BAPEN se sono necessari riproduzioni o adattamenti. Se il materiale viene utilizzato a scopi commerciali, può essere necessario pagare una tassa di autorizzazione.

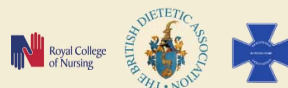

© BAPEN

© BAPEN. Prima pubblicazione maggio 2004 da parte del MAG, Malnutrition Advisory Group, un comitato permanente della BAPEN. Riesaminato e ristampato con piccole variazioni nel marzo 2008 e nel settembre 2010

Il 'MUST' è supportato dalla British Dietetic Association (Associazione britannica di dietetica), dal Royal College of Nursing (Collegio reale degli infermieri) e dalla Registered Nursing Home Association (Associazione registrata delle case di cura).

## Misure alternative: istruzioni e tabelle

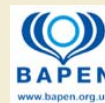

Se non è possibile ottenere l'altezza, usare la lunghezza dell'avambraccio (ulna) per calcolarla usando le tabelle seguenti.

(Vedere il libretto esplicativo del 'MUST' per dettagli sulle altre misure alternative (altezza al ginocchio e semiampiezza delle braccia) che possono essere utilizzate per stimare l'altezza).

### Stima dell'altezza dalla lunghezza dell'ulna

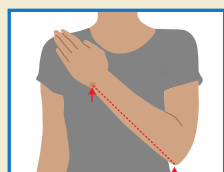

Misurare tra il punto del gomito (processo olecranico) e il punto centrale dell'osso sporgente del polso (processo stiloideo) (se possibile sul lato sinistro).

|                          |                   |      |      |      |      |      |      |      |      |      |      |      |      |      |      |
|--------------------------|-------------------|------|------|------|------|------|------|------|------|------|------|------|------|------|------|
| Altezza (m)              | Uomini (<65 anni) | 1.94 | 1.93 | 1.91 | 1.89 | 1.87 | 1.85 | 1.84 | 1.82 | 1.80 | 1.78 | 1.76 | 1.75 | 1.73 | 1.71 |
|                          | Uomini (≥65 anni) | 1.87 | 1.86 | 1.84 | 1.82 | 1.81 | 1.79 | 1.78 | 1.76 | 1.75 | 1.73 | 1.71 | 1.70 | 1.68 | 1.67 |
| Lunghezza dell'ulna (cm) |                   | 32.0 | 31.5 | 31.0 | 30.5 | 30.0 | 29.5 | 29.0 | 28.5 | 28.0 | 27.5 | 27.0 | 26.5 | 26.0 | 25.5 |
| Altezza (m)              | Donne (<65 anni)  | 1.84 | 1.83 | 1.81 | 1.80 | 1.79 | 1.77 | 1.76 | 1.75 | 1.73 | 1.72 | 1.70 | 1.69 | 1.68 | 1.66 |
|                          | Donne (≥65 anni)  | 1.84 | 1.83 | 1.81 | 1.79 | 1.78 | 1.76 | 1.75 | 1.73 | 1.71 | 1.70 | 1.68 | 1.66 | 1.65 | 1.63 |
| Altezza (m)              | Uomini (<65 anni) | 1.69 | 1.67 | 1.66 | 1.64 | 1.62 | 1.60 | 1.58 | 1.57 | 1.55 | 1.53 | 1.51 | 1.49 | 1.48 | 1.46 |
|                          | Uomini (≥65 anni) | 1.65 | 1.63 | 1.62 | 1.60 | 1.59 | 1.57 | 1.56 | 1.54 | 1.52 | 1.51 | 1.49 | 1.48 | 1.46 | 1.45 |
| Lunghezza dell'ulna (cm) |                   | 25.0 | 24.5 | 24.0 | 23.5 | 23.0 | 22.5 | 22.0 | 21.5 | 21.0 | 20.5 | 20.0 | 19.5 | 19.0 | 18.5 |
| Altezza (m)              | Donne (<65 anni)  | 1.65 | 1.63 | 1.62 | 1.61 | 1.59 | 1.58 | 1.56 | 1.55 | 1.54 | 1.52 | 1.51 | 1.50 | 1.48 | 1.47 |
|                          | Donne (≥65 anni)  | 1.61 | 1.60 | 1.58 | 1.56 | 1.55 | 1.53 | 1.52 | 1.50 | 1.48 | 1.47 | 1.45 | 1.44 | 1.42 | 1.40 |

### Stima della categoria di IMC in base alla circonferenza media del braccio (MUAC)

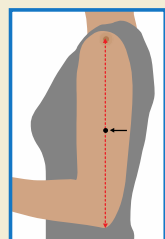

Il braccio sinistro del soggetto deve essere piegato al gomito con un angolo di 90 gradi, con il braccio parallelo al lato del corpo. Misurare la distanza tra la protrusione ossea sulla spalla (acromion) e il punto del gomito (processo olecranico). Segnare il punto centrale.

Chiedere al soggetto di lasciare il braccio pendere e misurarne la circonferenza nel punto centrale, assicurandosi che il metro a nastro sia aderente ma non stretto.

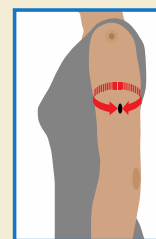

Se la MUAC è <23,5 cm, è probabile che l'IMC sia <20 kg/m<sup>2</sup>.

Se la MUAC è >32,0 cm, è probabile che l'IMC sia >30 kg/m<sup>2</sup>.

L'uso della MUAC fornisce un'indicazione generale dell'IMC e non è destinato a generare un punteggio vero e proprio da usare con il 'MUST'. Per ulteriori informazioni sull'uso della MUAC fare riferimento al libretto *esplicativo del 'MUST'*.

© BAPEN

**Allegato 7 - Documento di consenso dell'ESPEN 2018**

File allegato .pdf

**Allegato 8: Esempio di scheda per il monitoraggio dell'assunzione del supplemento nutrizionale preoperatorio**

File allegato .pdf

**Allegato 9: Esempio di diario del paziente per il monitoraggio della mobilizzazione e della assunzione di bevande ed alimenti post-intervento**

File allegato .pdf
